# Supplementary material for: Macrophages secrete murinoglobulin-1 and galectin-3 to regulate neutrophil degranulation after myocardial infarction
Source: Royal Society of Chemistry journal article supplement (doi:10.1039/d1mo00519g), 2022-03-01
Supplement: d1mo00519g1.xlsx [file d1mo00519g1.xlsx]

## Sheet: Supplementary table 1
Supplementary Table 1. Protein expression of D0 and MI D1 macrophage secretome; data are normalized total spectral counts.
	Day 0	Day 0	Day 0	Day 0	Day 1	Day 1	Day 1	Day 1
L-lactate dehydrogenase A chain	-0.697937	-0.697937	-0.697937	-0.697937	-0.697937	0.863772	1.74342	0.882489
neurofilament light polypeptide	-0.697937	-0.697937	-0.697937	-0.697937	-0.697937	0.863772	1.74342	0.882489
small conductance calcium-activated potassium channel protein 2	-0.697937	-0.697937	-0.697937	-0.697937	-0.697937	0.863772	1.74342	0.882489
EF-hand domain-containing protein 1	-0.502404	-0.502404	-0.502404	-0.502404	-0.502404	0.0556954	2.39394	0.0623843
uncharacterized protein C17orf59 homolog	-0.507317	-0.507317	-0.507317	-0.507317	-0.507317	-0.239693	2.33731	0.438972
serine protease 42	-0.673012	-0.673012	-0.673012	-0.673012	-0.673012	1.83861	1.07125	0.455198
Signal transducing adapter molecule 2	-0.702446	-0.702446	-0.702446	-0.702446	0.967243	-0.702446	1.69605	0.848935
Submaxillary gland androgen-regulated protein 2, eta	-0.702446	-0.702446	-0.702446	-0.702446	0.967243	-0.702446	1.69605	0.848935
zinc finger protein 617	-0.702446	-0.702446	-0.702446	-0.702446	0.967243	-0.702446	1.69605	0.848935
pyruvate kinase PKM	-0.553308	-0.553308	-0.553308	-0.553308	0.0877189	-0.553308	0.371546	2.30727
NADH dehydrogenase [ubiquinone] 1 alpha subcomplex subunit 10, mitochondrial	-0.723727	-0.723727	-0.723727	-0.723727	1.3095	1.14338	-0.723727	1.16575
Protein kish-A	-0.723727	-0.723727	-0.723727	-0.723727	1.3095	1.14338	-0.723727	1.16575
lysozyme C-2	-0.518752	-0.518752	-0.518752	-0.518752	0.137459	0.0838422	-0.518752	2.37246
coronin-1A	-0.701784	-0.701784	-0.701784	-0.701784	0.972205	0.83543	1.70128	-0.701784
protocadherin gamma subfamily A, 12	-0.678882	-0.678882	-0.678882	-0.678882	0.520929	1.82131	1.05217	-0.678882
Zinc transporter ZIP8	-0.576615	-0.576615	-0.576615	-0.576615	0.339683	-0.576615	2.26863	0.274758
Protein S100-A8	-0.650349	-0.650349	-0.650349	-0.650349	0.0338191	-0.368561	0.812034	2.1241
protein S100-A9	-0.689903	-0.689903	-0.689903	-0.689903	0.152133	-0.466369	1.28078	1.79307
ADP/ATP translocase 1	-0.698465	-0.698465	-0.698465	-0.698465	0.691708	1.11699	-0.698465	1.68363
Vimentin	-0.754166	-0.754166	-0.754166	-0.754166	1.31939	0.133416	-0.151752	1.71561
Klotho	-0.649297	-0.649297	-0.649297	0.572062	0.634166	-0.649297	-0.649297	2.04026
glycine amidinotransferase, mitochondrial	-0.57816	-0.57816	-0.57816	0.290604	0.334779	-0.57816	2.26542	-0.57816
vacuolar protein sorting-associated protein 37C	-0.934396	-0.934396	-0.934396	0.938439	1.033	0.872247	-0.934396	0.8939
RCC1 and BTB domain-containing protein 1	-0.901923	-0.901923	-0.901923	0.693287	0.773826	0.636907	1.50367	-0.901923
fibrocystin-L	-0.490679	-0.490679	-0.490679	2.25358	-0.490679	0.690496	-0.490679	-0.490679
retinal dehydrogenase 2	-0.490679	-0.490679	-0.490679	2.25358	-0.490679	0.690496	-0.490679	-0.490679
KDEL motif-containing protein 2	-0.353553	-0.353553	-0.353553	2.47487	-0.353553	-0.353553	-0.353553	-0.353553
Beta-actin-like protein 2	-1.04231	-1.04231	-1.04231	0.00985204	0.0633251	0.39832	1.16591	1.48952
transcription regulator protein BACH1	-0.578247	-0.578247	0.354206	-0.578247	-0.578247	-0.578247	2.26462	0.272412
uncharacterized protein LOC102642265	-0.578247	-0.578247	0.354206	-0.578247	-0.578247	-0.578247	2.26462	0.272412
Diphthamide biosynthesis protein 2	-0.702595	-0.702595	0.994904	-0.702595	-0.702595	0.827978	1.69009	-0.702595
Interleukin-17 receptor C	-0.901198	-0.901198	0.805749	-0.901198	-0.901198	0.637894	1.50481	0.656341
DNA damage-induced apoptosis suppressor protein	-0.680335	-0.680335	0.538061	-0.680335	-0.680335	1.81656	1.04705	-0.680335
Pre-mRNA-splicing regulator WTAP	-0.583022	-0.583022	0.338879	-0.583022	0.321911	-0.583022	2.25432	-0.583022
DNA repair endonuclease XPF	-0.597961	-0.597961	0.0330136	-0.597961	0.0215622	-0.597961	2.3596	-0.022335
Fructose-2,6-bisphosphatase TIGAR	-0.723426	-0.723426	1.28361	-0.723426	1.24727	1.08625	-0.723426	-0.723426
Protein SON	-0.723426	-0.723426	1.28361	-0.723426	1.24727	1.08625	-0.723426	-0.723426
rho guanine nucleotide exchange factor 4	-0.723426	-0.723426	1.28361	-0.723426	1.24727	1.08625	-0.723426	-0.723426
plastin-2	-0.615745	-0.615745	0.0674973	-0.615745	0.055124	0.000309736	-0.615745	2.34005
OTU domain-containing protein 7A	-0.853425	-0.853425	0.400855	-0.853425	0.37777	1.71217	0.922906	-0.853425
vasculin-like protein 1	-0.723489	-0.723489	1.31712	1.18387	-0.723489	1.11646	-0.723489	-0.723489
PAB-dependent poly(A)-specific ribonuclease subunit PAN3	-0.902654	-0.902654	0.7981	0.687039	-0.902654	0.630854	1.49462	-0.902654
Collagen alpha-1(XVIII) chain	-0.724098	-0.724098	1.26243	1.13185	1.22622	-0.724098	-0.724098	-0.724098
hemicentin-1	-0.875845	-0.875845	-0.211502	-0.254978	-0.223559	0.473384	2.23812	-0.269778
Zinc finger homeobox protein 3	-0.499033	-0.499033	0.781842	2.21236	-0.499033	-0.499033	-0.499033	-0.499033
matrix metalloproteinase-21	-0.485199	-0.485199	2.27717	-0.485199	-0.485199	0.634021	-0.485199	-0.485199
SUMO-interacting motif-containing protein 1	-0.492084	-0.492084	2.24712	-0.492084	0.705383	-0.492084	-0.492084	-0.492084
Coagulation factor XIII A chain	-0.633129	-0.633129	2.10455	-0.633129	0.573291	-0.633129	-0.633129	0.487809
ankyrin repeat domain-containing protein 23	-0.884662	-0.884662	1.4117	-0.884662	0.51226	1.20141	-0.884662	0.413279
Extended synaptotagmin-3	-0.704399	1.02475	-0.704399	-0.704399	-0.704399	-0.704399	1.66748	0.829762
Ryanodine receptor 3	-0.467403	0.464971	-0.467403	-0.467403	-0.467403	-0.467403	2.33945	-0.467403
glucose-6-phosphate isomerase	-0.722461	1.36827	-0.722461	-0.722461	-0.722461	1.11103	-0.722461	1.133
fer-1-like protein 5	-0.703706	1.02963	-0.703706	-0.703706	-0.703706	0.816356	1.67255	-0.703706
THAP domain-containing protein 7	-0.703706	1.02963	-0.703706	-0.703706	-0.703706	0.816356	1.67255	-0.703706
CD209 antigen-like protein C	-0.504117	0.841244	-0.504117	-0.504117	-0.504117	2.18346	-0.504117	-0.504117
protein prenyltransferase alpha subunit repeat-containing protein 1	-0.504117	0.841244	-0.504117	-0.504117	-0.504117	2.18346	-0.504117	-0.504117
Electrogenic sodium bicarbonate cotransporter 1	-0.708283	0.992749	-0.708283	-0.708283	0.914969	-0.708283	1.63369	-0.708283
neuron navigator 3	-0.906955	0.81491	-0.906955	-0.906955	0.737242	-0.906955	1.45493	0.62074
angiomotin	-0.853782	0.42505	-0.853782	-0.853782	0.366574	-0.853782	0.906911	1.71659
fibulin-1	-0.722894	1.31922	-0.722894	-0.722894	1.2273	1.06795	-0.722894	-0.722894
KIF1-binding protein	-0.722894	1.31922	-0.722894	-0.722894	1.2273	1.06795	-0.722894	-0.722894
olfactory receptor 599	-0.722894	1.31922	-0.722894	-0.722894	1.2273	1.06795	-0.722894	-0.722894
SIGLEC family-like protein 1	-0.722894	1.31922	-0.722894	-0.722894	1.2273	1.06795	-0.722894	-0.722894
rho guanine nucleotide exchange factor 10	-0.705749	1.01464	-0.705749	0.857224	-0.705749	-0.705749	1.65689	-0.705749
integrin alpha-6	-0.722751	1.35259	-0.722751	1.16392	-0.722751	1.09724	-0.722751	-0.722751
protocadherin beta 7	-0.722751	1.35259	-0.722751	1.16392	-0.722751	1.09724	-0.722751	-0.722751
Eomesodermin homolog	-0.654971	0.692738	-0.654971	0.569425	-0.654971	2.01269	-0.654971	-0.654971
uncharacterized protein LOC623272	-0.85214	0.443589	-0.85214	0.325032	-0.85214	1.71263	0.927306	-0.85214
uncharacterized protein LOC102641811	-0.723683	1.29834	-0.723683	1.11333	1.20674	-0.723683	-0.723683	-0.723683
PR domain zinc finger protein 13	-0.827112	0.533323	-0.827112	0.408845	0.471691	-0.827112	-0.827112	1.89459
Sarcoplasmic/endoplasmic reticulum calcium atpase 3	-0.801925	0.503274	-0.801925	0.384618	1.97712	0.342682	-0.801925	-0.801925
centrosomal protein of 120 kDa	-0.709135	0.984211	0.936911	-0.709135	-0.709135	-0.709135	1.62455	-0.709135
nesprin-1	-0.722788	1.3064	1.25081	-0.722788	-0.722788	1.05673	-0.722788	-0.722788
ubiquitin-associated domain-containing protein 2	-0.826231	0.538386	0.500997	-0.826231	-0.826231	0.370482	-0.826231	1.89506
histone-arginine methyltransferase CARM1	-0.724353	1.25581	1.20069	-0.724353	1.16526	-0.724353	-0.724353	-0.724353
Septin-5	-1.04013	-0.196753	-0.219861	-1.04013	-0.234715	-0.300523	1.45707	1.57504
alpha-actinin-1	-1.35088	-0.0490967	-0.0853293	-1.35088	-0.108622	1.23777	0.441414	1.26563
Murinoglobulin-1	-1.29222	-0.363248	-0.389197	-1.29222	0.706221	0.558377	1.49396	0.57833
collagen alpha-3(V) chain	-0.723647	1.28584	1.23043	1.10197	-0.723647	-0.723647	-0.723647	-0.723647
G2/M phase-specific E3 ubiquitin-protein ligase	-0.723647	1.28584	1.23043	1.10197	-0.723647	-0.723647	-0.723647	-0.723647
eukaryotic translation initiation factor 2-alpha kinase 1	-0.715205	0.26209	0.23514	0.172669	-0.715205	-0.715205	2.19092	-0.715205
Rab GDP dissociation inhibitor beta	-0.932884	1.05269	0.998287	0.872179	-0.932884	0.808383	-0.932884	-0.932884
asparagine synthetase [glutamine-hydrolyzing]	-0.831593	0.537191	0.499446	0.41195	-0.831593	1.87779	-0.831593	-0.831593
large proline-rich protein BAG6	-1.20409	0.839493	0.783501	0.65371	0.747507	0.588049	-1.20409	-1.20409
calmodulin	-0.897691	-0.315271	-0.331228	0.28897	0.342407	-0.386932	-0.897691	2.19744
phospholipid-transporting ATPase IC	-0.495847	0.746169	2.22891	-0.495847	-0.495847	-0.495847	-0.495847	-0.495847
homeobox protein cut-like 2	-0.669674	0.501572	1.89983	-0.669674	-0.669674	-0.669674	0.946969	-0.669674
maestro heat-like repeat-containing protein family member 6	-1.05824	-0.638905	-0.147461	-0.677273	-0.162328	0.234471	2.202	0.247735
cytoplasmic phosphatidylinositol transfer protein 1	-0.821696	0.259685	1.51889	1.38158	-0.821696	0.126631	-0.821696	-0.821696
periplakin	-1.48008	-0.452892	0.743206	1.77174	-0.499127	-0.579277	-0.0718906	0.568314
putative RNA-binding protein 15	-0.801713	-0.319548	0.845233	-0.801713	-0.801713	1.24529	1.43588	-0.801713
lipase member M	-0.53878	1.74517	-0.53878	-0.53878	-0.53878	-0.53878	-0.53878	1.4875
translation initiation factor IF-2, mitochondrial	-0.817562	1.85951	-0.817562	-0.817562	0.334382	0.240261	0.836093	-0.817562
STE20/SPS1-related proline-alanine-rich protein kinase	-0.640122	1.22678	-0.640122	0.121397	-0.640122	-0.640122	1.85243	-0.640122
TANK-binding kinase 1-binding protein 1	-1.16695	0.914354	-0.254846	0.743779	-1.16695	-0.344539	1.60983	-0.334682
aspartate aminotransferase, mitochondrial	0.357294	-0.622103	-0.622103	-0.622103	-0.622103	0.619256	-0.622103	2.13396
glyceraldehyde-3-phosphate dehydrogenase	0.357294	-0.622103	-0.622103	-0.622103	-0.622103	0.619256	-0.622103	2.13396
Leucine-rich repeat and coiled-coil domain-containing protein 1	0.361762	-0.62494	-0.62494	-0.62494	-0.62494	2.12291	-0.62494	0.640033
sterile alpha motif domain-containing protein 13	0.25756	-0.652603	-0.652603	-0.652603	-0.652603	1.88209	1.12336	-0.652603
Cytochrome b-c1 complex subunit 2, mitochondrial	-0.105385	-0.616816	-0.616816	-0.616816	-0.616816	1.58361	-0.616816	1.60586
EH domain-binding protein 1	0.848709	-0.714834	-0.714834	-0.714834	1.4358	-0.714834	-0.714834	1.28966
Heat shock protein HSP 90-beta	0.848709	-0.714834	-0.714834	-0.714834	1.4358	-0.714834	-0.714834	1.28966
heat shock cognate 71 kDa protein	-0.13723	-0.635154	-0.635154	-0.635154	0.0497341	-0.635154	0.336425	2.29169
long-chain specific acyl-CoA dehydrogenase, mitochondrial	0.576659	-0.923584	-0.923584	-0.923584	1.13998	0.977933	-0.923584	0.999761
rho GDP-dissociation inhibitor 1	0.576659	-0.923584	-0.923584	-0.923584	1.13998	0.977933	-0.923584	0.999761
Transketolase	0.190102	-0.795523	-0.795523	-0.795523	0.560191	0.453729	-0.795523	1.97807
ATP synthase subunit O, mitochondrial	0.347136	-0.630839	-0.630839	-0.630839	0.714353	2.0927	-0.630839	-0.630839
Cytochrome c oxidase subunit 5A, mitochondrial	-0.183149	-0.670014	-0.670014	-0.670014	-0.000337893	2.1635	-0.670014	0.700044
protein FAM208B	0.314547	-0.611613	-0.611613	-0.611613	2.16777	-0.611613	-0.611613	0.575745
trafficking kinesin-binding protein 1	0.22107	-0.642585	-0.642585	-0.642585	1.94922	-0.642585	1.04263	-0.642585
Fc fragment of IgG binding protein-like	-0.34093	-0.747976	-0.747976	-0.747976	0.473558	-0.747976	1.83824	1.02104
histone H3.3C	-0.368968	-0.752362	-0.752362	-0.752362	0.398194	1.47896	-0.752362	1.50126
preferentially expressed antigen in melanoma like 7	0.598988	-0.68337	-0.68337	0.99902	-0.68337	-0.68337	1.81885	-0.68337
lon protease homolog 2, peroxisomal	0.390211	-0.881474	-0.881474	0.786914	-0.881474	-0.881474	1.59992	0.748855
growth/differentiation factor 7	0.393295	-0.880888	-0.880888	0.790777	-0.880888	0.734104	1.60538	-0.880888
rho-related GTP-binding protein RhoU	-0.229675	-1.2978	-1.2978	0.103526	0.171391	0.0560181	0.786387	1.70794
Differentially expressed in FDCP 6	0.837346	-0.713974	1.45767	-0.713974	-0.713974	-0.713974	-0.713974	1.27485
Protein FAM53B	0.336893	-0.630466	0.723711	-0.630466	-0.630466	-0.630466	-0.630466	2.09172
uncharacterized protein LOC105247232	0.124311	-0.562601	0.398987	-0.562601	-0.562601	-0.562601	2.28971	-0.562601
DnaJ homolog subfamily B member 11	-0.118298	-0.583232	0.0676157	-0.583232	-0.583232	-0.583232	2.37079	0.0128241
E3 ubiquitin-protein ligase NHLRC1	0.843615	-0.714071	1.46649	-0.714071	-0.714071	1.26025	-0.714071	-0.714071
glutathione S-transferase Mu 1	0.843615	-0.714071	1.46649	-0.714071	-0.714071	1.26025	-0.714071	-0.714071
glutathione S-transferase Mu 7	0.843615	-0.714071	1.46649	-0.714071	-0.714071	1.26025	-0.714071	-0.714071
maestro heat-like repeat-containing protein family member 2B	0.186732	-0.796967	0.580084	-0.796967	-0.796967	0.449845	-0.796967	1.97121
von Willebrand factor	0.797415	-0.712611	1.40123	-0.712611	1.36441	-0.712611	-0.712611	-0.712611
5'-3' exoribonuclease 2	-0.378139	-0.865235	-0.183364	-0.865235	-0.19524	-0.247854	2.22959	0.505475
RING finger protein 214	0.298021	-0.619264	0.664816	-0.619264	2.13349	-0.619264	-0.619264	-0.619264
Filaggrin-2	0.82449	-0.713673	1.43956	1.30432	-0.713673	-0.713673	-0.713673	-0.713673
Low-density lipoprotein receptor-related protein 6	0.559496	-0.922266	1.15201	1.02173	-0.922266	0.955827	-0.922266	-0.922266
protein FAM71F2	-0.640232	-0.859144	-0.552696	-0.571943	-0.202195	-0.249501	1.97732	1.09839
myoblast determination protein 1	-0.740667	-1.68225	-0.364157	1.02382	1.14341	0.93994	0.155021	-0.475121
Soluble scavenger receptor cysteine-rich domain-containing protein SSC5D	-0.718063	-1.45354	-0.423968	0.660196	0.75361	1.71084	-0.0184317	-0.510642
dedicator of cytokinesis protein 3	0.454815	-0.466269	2.3428	-0.466269	-0.466269	-0.466269	-0.466269	-0.466269
Cadherin-related family member 5	0.213295	-0.640313	1.96297	-0.640313	-0.640313	-0.640313	1.0253	-0.640313
Uncharacterized protein C19orf57 homolog	-0.310587	-0.657904	0.401323	-0.657904	-0.657904	-0.217689	2.3133	-0.212636
receptor-type tyrosine-protein phosphatase S	0.825893	1.49941	-0.712538	-0.712538	-0.712538	1.23738	-0.712538	-0.712538
heparin cofactor 2	0.55627	1.20295	-0.92086	-0.92086	-0.92086	0.951361	-0.92086	0.972853
protein Lines homolog	0.366101	0.913249	-0.883673	-0.883673	-0.883673	0.70038	1.55496	-0.883673
1-phosphatidylinositol 4,5-bisphosphate phosphodiesterase delta-4	0.781192	1.4347	-0.711515	-0.711515	1.34169	-0.711515	-0.711515	-0.711515
citrate synthase, mitochondrial	0.153796	0.718758	-1.13667	-1.13667	0.638349	-1.13667	1.38136	0.517735
Carbamoyl-phosphate synthase [ammonia], mitochondrial	-0.0565229	0.573856	-1.49641	-1.49641	0.484137	0.328607	1.31318	0.349557
RNA polymerase II-associated protein 1	0.157184	0.576546	-0.800706	1.95224	0.51686	-0.800706	-0.800706	-0.800706
Fc receptor-like protein 5	0.771218	1.42016	1.36394	-0.711063	-0.711063	-0.711063	-0.711063	-0.711063
Protein delta homolog 1	0.771218	1.42016	1.36394	-0.711063	-0.711063	-0.711063	-0.711063	-0.711063
AP-4 complex subunit sigma-1	0.517056	1.14578	1.09131	-0.919056	-0.919056	-0.919056	-0.919056	0.922071
uncharacterized protein LOC102638515	0.151971	0.716045	0.667177	-1.13646	-1.13646	0.496591	1.37761	-1.13646
nudC domain-containing protein 2	-0.340303	-0.103938	-0.124415	-0.880198	-0.137579	-0.880198	0.173278	2.29335
remodeling and spacing factor 1	0.0483422	0.76169	0.69989	-1.58106	0.660162	0.484162	-1.58106	0.507869
olfactory receptor 1034	-0.494128	-0.267852	-0.287455	-1.01098	-0.300057	-0.355885	2.27289	0.443461
profilin-1	-0.704477	-0.48176	-0.501054	-1.2132	1.14039	0.203533	-0.220549	1.77712
gem-associated protein 5	0.0618482	0.781773	0.719403	0.574826	-1.58257	0.501686	-1.58257	0.525612
pejvakin	-0.26453	0.0631295	0.0347432	-0.0310583	0.0164948	2.20713	-1.01296	-1.01296
Neuronal tyrosine-phosphorylated phosphoinositide-3-kinase adapter 1	-0.0156515	0.404413	1.95106	-0.975145	0.344627	0.240987	-0.975145	-0.975145
cofilin-1	-0.799208	-0.616928	0.0542166	-0.669325	-0.642871	1.2076	-0.403144	1.86966
Cell division cycle protein 23 homolog	-0.581502	-0.474891	-0.0823577	-0.505537	-0.0942326	-0.825018	2.33024	0.233299
sorting nexin-32	-0.917052	-0.683268	0.17751	-0.75047	0.15147	0.846475	1.94179	-0.766452
probable ATP-dependent RNA helicase DDX17	-0.436839	-0.145423	0.927549	1.85021	-0.186899	-1.10248	0.196358	-1.10248
ATP-binding cassette sub-family A member 12	-0.344518	0.966885	-0.96143	-0.96143	-0.112875	-0.96143	1.60021	0.774587
IQ motif and SEC7 domain-containing protein 2	-0.576878	0.435103	-0.386517	-1.05293	0.3757	-1.05293	1.97175	0.28671
tetratricopeptide repeat protein 27	-0.0124027	1.99545	0.365289	0.282246	-0.95694	0.240235	-0.95694	-0.95694
Nuclear receptor coactivator 3	-0.363745	0.876689	0.832332	1.64117	-0.144638	-0.94727	-0.94727	-0.94727
ovochymase-2	-0.151627	1.05483	1.94805	0.0254177	-0.719167	-0.719167	-0.719167	-0.719167
contactin-1	-0.0382637	2.29185	-0.649272	0.15234	0.191162	-0.649272	-0.649272	-0.649272
zinc finger protein 431-like, partial	0.56506	-0.818123	-0.818123	-0.818123	0.00886786	-0.818123	1.77484	0.923727
voltage-dependent anion-selective channel protein 1	0.833441	-0.877538	-0.877538	-0.877538	0.145439	1.25417	-0.877538	1.27711
cytochrome c oxidase subunit 4 , mitochondrial	-0.132823	-0.817047	-0.817047	-0.817047	0.680152	1.08844	-0.817047	1.63242
myosin-14	1.31287	-0.533624	-0.533624	1.88887	-0.533624	-0.533624	-0.533624	-0.533624
Histone H1.2	1.83968	-0.685246	0.861097	-0.685246	-0.685246	-0.685246	-0.685246	0.725453
Histone H1.4	1.83968	-0.685246	0.861097	-0.685246	-0.685246	-0.685246	-0.685246	0.725453
zinc finger protein neuro-d4	0.884943	-1.04935	1.58914	-1.04935	-1.04935	0.0196744	0.621817	0.0324869
serpin B12	-0.470574	-1.14549	1.29595	-0.278874	-0.739296	-0.772485	1.4666	0.644173
myosin regulatory light chain 2, ventricular/cardiac muscle isoform	1.22566	0.507488	-0.686332	-0.686332	-0.686332	1.69852	-0.686332	-0.686332
transmembrane channel-like protein 5	0.569025	-0.154626	-1.37998	-0.266745	1.23801	-1.37998	0.30282	1.07148
protocadherin gamma-A11	1.78788	0.85941	0.816055	-0.692669	-0.692669	-0.692669	-0.692669	-0.692669
Replication factor C subunit 1	1.78788	0.85941	0.816055	-0.692669	-0.692669	-0.692669	-0.692669	-0.692669
Ubiquitin carboxyl-terminal hydrolase 48	1.63068	0.697184	0.653595	0.552554	-0.883503	-0.883503	-0.883503	-0.883503
delta-1-pyrroline-5-carboxylate synthase	1.59672	0.235501	0.17194	0.0246018	0.13108	-0.0499354	-2.08435	-0.0255526
U5 small nuclear ribonucleoprotein 200 kDa helicase	-0.355145	-0.719131	0.00319889	-1.33945	1.43808	-0.795456	0.497297	1.27061
Ubinuclein-2	-0.540129	-0.218759	-0.85214	-0.311164	-0.861088	-0.343856	1.77361	1.35352
NCK-interacting protein with SH3 domain	-0.7306	0.103108	1.60151	-1.62374	-0.0156899	-0.221424	1.0805	-0.193659
Trifunctional enzyme subunit alpha, mitochondrial	2.21023	-0.600295	-0.600295	-0.600295	-0.600295	0.389688	-0.600295	0.401553
Cytochrome c oxidase subunit NDUFA4	0.960361	-0.903574	-0.903574	-0.903574	0.663902	1.4372	-0.903574	0.552836
cytochrome c oxidase subunit 6B1	1.24476	-0.890628	-0.890628	-0.112046	-0.0726455	1.74242	-0.890628	-0.130605
DBF4-type zinc finger-containing protein 2 homolog	0.258694	-0.966094	-0.487622	-0.966094	0.0813747	-0.534673	2.05505	0.559362
hemoglobin, beta adult t chain	0.32928	-1.07895	-0.531038	-0.567056	0.124874	-1.07895	1.49833	1.30352
peptidyl-prolyl cis-trans isomerase A	-0.201923	-0.935539	-0.650104	-0.668867	1.07916	-0.0306495	-0.53243	1.94035
synaptonemal complex central element protein 1-like	1.74307	-0.66237	0.265984	1.30279	-0.66237	-0.66237	-0.66237	-0.66237
Solute carrier family 25 member 33	0.480257	-1.54069	0.214604	0.110881	-0.773346	0.0583145	-0.433592	1.88357
Fatty acid-binding protein, heart	2.08004	0.372875	0.341476	0.268691	-0.76577	-0.76577	-0.76577	-0.76577
ubiquitin-40S ribosomal protein S27a-like	-0.405142	-1.26692	-0.593282	-0.66674	0.0656409	-0.0697534	1.70729	1.22891
uncharacterized protein LOC105242465	1.13861	-0.0637637	1.83811	-0.137142	-0.870912	-0.163076	-0.870912	-0.870912
tetraspanin-14	-0.465511	-0.643621	-1.46514	-0.0200071	0.070717	-0.0834987	1.94057	0.666492
poly [ADP-ribose] polymerase 14	1.3874	0.539642	0.367419	-0.0308251	0.256936	-0.232655	-2.12134	-0.166582
transcription elongation factor SPT5	0.325278	0.0341249	-0.0250233	-0.161796	1.20184	0.949743	-2.11574	-0.20842
methylcytosine dioxygenase TET3	0.704493	0.429626	0.373786	1.39201	-0.856091	-1.81134	-0.433138	0.200648
Complement C3	-0.266514	0.151385	-0.934605	-1.3545	0.0918663	-0.493993	1.34156	1.4648
sacsin	-0.271385	0.775912	-0.63031	-0.770449	-0.669188	-0.841472	2.00375	0.403139
peroxisome proliferator-activated receptor delta	-0.223858	0.50308	0.440026	-0.570262	1.29898	-1.45927	-1.08087	1.09218
arf-GAP with SH3 domain, ANK repeat and PH domain-containing protein 2	-1.30344	-0.444862	-0.519335	-0.691718	0.495171	0.2129	2.00037	0.250918
IQ calmodulin-binding motif-containing protein 1	0.232937	1.37484	0.689336	-1.02618	-1.02618	-1.02618	-0.356234	1.13767
RIKEN cDNA 1810009J06	-0.890562	0.490281	0.920169	-0.155045	1.35569	-0.207414	-1.77393	0.260813
troponin C, slow skeletal and cardiac muscles	2.47487	-0.353553	-0.353553	-0.353553	-0.353553	-0.353553	-0.353553	-0.353553
Aconitate hydratase, mitochondrial	1.69811	-0.871794	-0.871794	-0.871794	0.674946	0.548531	-0.871794	0.565591
14-3-3 protein epsilon	0.675217	-0.297625	-0.343155	-0.448438	0.601242	0.407189	-1.94535	1.35092
14-3-3 protein theta	0.634591	-0.938737	-1.01237	-1.18264	0.514955	0.201123	0.0557079	1.72737
tropomyosin alpha-3 chain isoform Tpm3.2cy	0.88572	0.920091	-0.033335	0.715933	-1.48575	0.643832	-1.48575	-0.16074
hemoglobin alpha, adult chain 2	0.712202	-0.239596	-1.15647	-0.322976	-1.15647	-0.352476	0.829304	1.68648
tumor necrosis factor ligand superfamily member 9	1.33684	1.56626	-0.767541	-0.0932011	-0.0350985	-1.37134	-0.515302	-0.120612
NAD-dependent malic enzyme, mitochondrial	-0.891894	-0.0055325	-0.750404	1.00432	1.18433	0.878312	0.142409	-1.56154
Apolipoprotein A-I	-1.05663	0.561809	1.64104	0.0963517	-0.870494	-1.18975	0.831941	-0.0142694
dynein heavy chain 8, axonemal	-0.943844	0.767602	1.33368	1.14852	-1.20677	-0.978315	-0.0334562	-0.0874194
RING finger protein 17	-0.0729961	1.4264	1.73078	-0.672526	-0.394079	-0.672526	-0.672526	-0.672526
Histone H2B type 2-E	0.700735	-1.45708	-0.617541	-0.672709	-0.122681	0.728144	-0.271479	1.71261
histone H2B type 1-M	0.0529591	-1.21115	-0.719323	-0.751642	0.467156	0.906053	-0.516591	1.77254
histone H2A type 1-F	-0.190802	-1.19848	-0.80959	-0.605386	1.09896	0.939834	-0.647152	1.41262
myoglobin	1.19467	-0.3861	0.501023	1.70372	-0.753328	-0.753328	-0.753328	-0.753328
14-3-3 protein zeta/delta	0.578875	-0.822686	-0.412242	-0.481023	1.68819	-0.515809	-1.12898	1.09368
group XIIB secretory phospholipase A2-like protein	-0.269366	-0.6054	-0.315007	-0.782198	-0.326134	-0.375349	2.34394	0.329519
Inter-alpha-trypsin inhibitor heavy chain H2	-0.490964	0.0725066	-0.583015	-1.52527	0.291033	-0.146753	1.94723	0.435233
fatty acid-binding protein, adipocyte	1.9494	1.06273	0.120608	-0.353705	-0.69476	-0.69476	-0.69476	-0.69476
trypsin 4	-0.165578	0.643561	2.09799	-1.03237	-0.222711	-0.372391	-0.950163	0.00166117
Malate dehydrogenase, mitochondrial	1.1303	-0.357058	-1.17779	-0.0723449	-0.011272	0.979419	-1.49512	1.00386
ferritin light chain 1	0.370472	0.723875	1.71154	-0.169196	-1.13929	-0.442105	-1.34328	0.287977
antithrombin-III	-1.55944	-0.864539	1.40255	0.588189	0.182975	-0.867378	0.338373	0.779274
Raftlin-2	1.4096	0.743156	-0.247602	0.531004	0.181491	-0.822516	-1.84539	0.0502608
60S ribosomal protein L19	-0.207151	0.222195	0.798431	1.79678	-1.3833	-1.01099	0.0955675	-0.311537
28S ribosomal protein S25, mitochondrial	-0.761405	-1.24824	-0.405298	1.02308	0.417268	-0.973645	0.412302	1.53594
Try10-like trypsinogen	-0.889257	0.575897	-0.57298	-1.08816	1.7769	0.428588	0.590695	-0.82169
ATP synthase subunit alpha, mitochondrial	0.724943	-0.619341	-0.939204	-0.808731	-0.292933	0.929613	-0.741976	1.74763
ATP synthase subunit beta, mitochondrial	0.0836894	-0.707	-0.993322	-0.292089	-0.0308769	1.72384	-0.993322	1.20908
alpha-2-HS-glycoprotein	0.740749	-0.546558	-0.94134	-0.705369	-0.283514	-0.761489	1.95227	0.545251
histone H4	0.702898	-1.10447	-0.480813	-1.13669	1.79168	0.0170409	-0.409744	0.620103
trypsinogen 7	-0.933204	1.01381	0.545041	0.827792	0.454821	0.0554962	0.0133315	-1.97709
protease, serine, 1	-0.777943	1.0186	0.914493	-0.629957	0.653855	0.732312	-1.77228	-0.139076
myosin light chain 3	1.89549	0.561557	-0.426265	-0.0197393	-0.282329	0.527381	-1.18671	-1.06938
tropomyosin alpha-1 chain isoform Tpm1.1st	1.63957	0.390815	-0.457831	1.04763	-0.735251	0.236539	-1.11114	-1.01033
Actin, cytoplasmic 1	-0.232182	-0.75062	-0.47421	-1.00921	-0.296779	-0.367001	1.47004	1.65997
myosin-3	2.21181	-0.399437	-0.311807	0.420318	-0.222163	0.0986894	-0.898707	-0.898707
actin, alpha cardiac muscle 1	1.98136	0.145357	-1.05665	-0.470115	-1.12036	-0.212974	0.0964278	0.636944
protein piccolo	0.262756	-0.539665	0.843736	1.37127	-0.419236	-1.84147	0.624259	-0.301644
Centrosomal protein of 162 kDa	0.0712649	0.706963	1.18964	1.36903	-0.61389	-0.446051	-1.00148	-1.27548
Myosin-4	2.14098	-0.421729	-0.365728	0.48694	-0.234191	0.239185	-1.08485	-0.760611
Dedicator of cytokinesis protein 7	-0.219716	1.39033	0.343878	0.185544	0.675939	0.0294088	-2.07314	-0.332246
myosin-7	1.98082	-0.35738	-0.375367	0.593914	-0.232956	0.472207	-1.11801	-0.963229
myosin-6	2.08081	-0.391243	-0.406347	0.498587	-0.223925	0.388925	-1.03267	-0.91414
