# Supplementary material for: Macrophages secrete murinoglobulin-1 and galectin-3 to regulate neutrophil degranulation after myocardial infarction
Source: Royal Society of Chemistry journal article supplement (doi:10.1039/d1mo00519g), 2022-03-01
Supplement: d1mo00519g2.xlsx [file d1mo00519g2.xlsx]

## Sheet: Sheet1
Supplementary Table 2. Protein expression in RnD array of secretome from neutrophils stimulated with macrophage secretome. Values are normalized intensity units.
	Unstimulated A	Unstimulated B	Unstimulated C	Unstimulated D	PMA A	PMA B	PMA C	PMA D	PMA+Mac A	PMA+Mac B	PMA+Mac C	PMA+Mac D	PMA+Mac+M1 A	PMA+Mac+M1 B	PMA+Mac+M1 C	PMA+Mac+M1 D
	M1	M2	M3	M4	M1	M2	M3	M4	M1	M2	M3	M4	M1	M2	M3	M4
Adiponectin/Acrp30	0.405756	-0.952248	-0.648299	-1.17502	-0.211129	1.74131	1.08852	0.285005	-0.900766	-0.310892	-0.70411	-1.15799	2.11844	0.685799	0.0211026	-0.285481
Amphiregulin	-0.199865	-0.9076	-0.908671	-0.97863	-0.209564	0.157159	-0.178248	-0.144388	-0.557004	-0.567927	-0.509332	-0.882922	2.40041	1.83437	1.0107	0.641513
Angiopoietin-1	1.47832	-0.880296	-0.800291	-1.07597	0.27779	1.90025	0.669852	0.787688	-0.780199	-1.17823	-0.355012	-1.475	0.428026	1.00119	0.0039256	-0.00204765
Angiopoietin-2	1.13674	-0.984804	-1.07892	-1.04407	0.315312	1.43804	1.01371	-0.412399	-0.235571	-0.825562	-0.370079	-1.58371	1.51296	0.932285	0.622715	-0.436651
Angiopoietin-like 3	1.17783	-0.398274	-1.40558	-1.30979	0.319849	1.25204	0.483056	0.625698	-0.452879	-0.902434	-0.411191	-1.27444	1.86378	0.807394	0.291786	-0.666842
BAFF/BLyS/TNFSF13B	-0.326213	-1.58665	-0.951354	-1.8063	0.778691	1.96216	1.21705	0.654938	0.273431	-0.535711	0.0944352	-0.608754	0.68695	0.673824	-0.129133	-0.397368
C1q R1/CD93	1.94554	-1.01425	-0.938544	-0.883875	0.364949	1.50041	0.756748	-0.116759	-0.356474	-1.43137	0.125368	-1.35553	0.952781	0.579206	0.305188	-0.433387
CCL2/JE/MCP-1	2.23442	-1.12308	-1.08258	-0.960076	0.217003	0.754127	0.678213	0.710939	-0.324861	0.56528	-0.155596	-1.89707	0.713443	0.32001	-0.00868457	-0.641485
CCL3/CCL4 MIP-1 alpha/beta	0.85728	-0.92165	-1.01596	-0.818132	-0.0340213	0.281535	0.148576	0.0915618	-0.532207	-0.512073	-0.27531	-0.584694	3.20116	0.545649	-0.186038	-0.24568
CCL5/RANTES	1.64364	-1.25577	-1.18826	-0.840357	0.314844	1.37149	-0.23794	1.71198	-0.470344	-0.556908	0.0659739	0.559598	-0.33356	1.02088	-0.946915	-0.858352
CCL6/C10	-0.985584	-1.71519	-1.58088	-1.72328	0.420615	0.370287	1.4548	0.543843	-0.0263748	-0.115201	0.688108	0.0571616	1.30702	0.714629	0.357619	0.232416
CCL11/Eotaxin	0.679074	-1.29049	-1.35347	-1.50048	-0.0721365	1.70822	0.446623	-0.192748	-0.556643	-0.916546	-0.260772	-0.428488	1.3041	1.3273	0.831	0.275443
CCL12/MCP-5	0.829191	-1.18067	-1.15817	-1.29297	0.156656	1.35391	0.909662	-0.241059	-0.605784	-0.800188	-0.276156	-1.31668	1.58615	1.19181	0.583775	0.260524
CCL17/TARC	0.83294	-1.33471	-1.32403	-1.29851	0.0977595	1.3305	0.525853	0.027839	-0.228611	-0.54675	-0.337966	-0.825041	2.29198	0.748471	0.204745	-0.16448
CCL19/MIP-3 beta	0.666862	-1.025	-1.23458	-1.08255	0.128205	0.751815	0.277197	0.0365851	-0.181569	-0.538351	-0.268401	-1.10044	2.71781	1.01143	0.166271	-0.325288
CCL20/MIP-3 alpha	1.08272	-0.922007	-0.716455	-0.988469	0.475509	2.28746	0.811592	0.650914	-0.480567	-0.92893	-0.344875	-1.63332	0.664634	0.652047	-0.225735	-0.384525
CCL21/6Ckine	2.05692	-0.851373	-0.879614	-0.846945	0.5178	1.60426	0.415167	0.010732	0.129012	-1.0404	-0.16964	-1.80115	0.951756	0.37492	-0.167081	-0.304353
CCL22/MDC	1.47222	-1.44458	-1.57563	-1.5635	0.366956	1.0656	1.05093	0.755789	-0.283874	-0.378589	-0.183182	-0.875741	1.25052	0.471865	0.0993489	-0.228138
CD14	1.96405	-1.28888	-1.49193	-1.51814	0.412021	0.9322	1.22834	0.785426	-0.0911099	-0.494009	-0.104912	-0.86877	0.635859	0.450758	-0.208964	-0.341936
CD40/TNFRSF5	0.538509	-1.17108	-1.16446	-1.07498	-0.277049	0.406038	0.0102716	-0.0359745	-0.437122	-0.587952	-0.529393	-0.838365	2.44049	1.52348	0.785978	0.411609
CD160	0.383117	-0.551683	-0.878679	-0.997146	0.0206596	0.850376	0.462678	-0.348912	-0.439202	-1.17134	-0.323672	-1.29947	2.58773	1.05123	0.745066	-0.0907484
Chemerin	-0.214501	-0.828941	-0.853848	-0.92378	-0.432502	0.316218	-0.2826	-0.51693	-0.545056	-0.537554	-0.483283	-0.767489	2.2726	1.88727	1.16774	0.742664
Chitinase 3-like 1	-0.468384	-1.66176	-1.70125	-1.68814	0.486822	1.52699	0.821336	0.872926	0.145223	-0.0912569	-0.0978157	-0.524764	1.05601	0.852624	0.202607	0.268836
Coagulation Factor III/ Tissue Factor	-0.0627998	-0.689462	-0.725622	-0.735826	-0.524285	0.397119	-0.090301	-0.545245	-0.470448	-0.504258	-0.403717	-0.823919	3.00024	1.45834	0.429913	0.290269
Complement Component C5/C5a	0.423749	-0.878264	-0.828371	-1.00784	-0.0983567	0.503909	0.0802896	-0.421244	-0.605152	-0.84581	2.27571	-1.29331	1.65666	0.989541	0.371846	-0.323349
Complement Factor D	1.31546	-0.855507	-0.06507	-0.902308	-0.374905	1.93757	0.337188	-0.918591	-0.615284	-0.842292	-0.550313	-1.28813	1.1609	1.55442	0.207166	-0.100309
C-Reactive Protein/CRP	0.127269	0.12227	0.256334	0.0285384	-0.56748	0.462316	-0.259587	-1.44685	2.85003	-0.783347	-0.264813	-1.72123	0.542073	0.213388	0.213615	0.227476
CX3CL1/Fractalkine	1.55234	-1.0332	-1.11082	-1.02765	0.761317	1.87097	0.98739	-0.840583	-0.282279	-0.301822	-0.35365	-1.41882	0.838238	0.608882	0.0444017	-0.294708
CXCL1/KC	1.60329	-0.017956	-0.465717	-0.90355	-0.00699163	1.36014	1.34518	-0.856581	-0.186274	-0.798944	-0.295325	-2.19364	0.535151	1.01966	0.148287	-0.286731
CXCL2/MIP-2	1.34346	-1.33932	-1.22607	-1.08775	-0.674061	1.22247	0.641233	-0.550179	-0.246844	-0.785441	-0.246723	-0.870546	1.72072	0.902045	0.778344	0.418655
CXCL9/MIG	-0.26346	-0.808917	-0.85393	-0.920819	-0.259244	-0.0456028	-0.0597179	-0.0913699	-0.461071	-0.675465	-0.563502	-1.0152	1.6799	2.24218	1.57462	0.521607
CXCL10/IP-10	0.281661	-0.8234	-0.786597	-1.04854	-0.239106	0.514284	0.239445	0.136236	-0.571425	-0.747318	-0.512161	-1.61526	1.46701	1.90951	1.59066	0.205003
CXCL11/I-TAC	-0.129809	-0.864947	-0.898345	-0.950186	-0.305256	0.252334	-0.150425	-0.127467	-0.453659	-0.607415	-0.488252	-0.846122	1.18922	2.6843	1.45727	0.238764
CXCL13/BLC/BCA-1	0.396549	-0.696949	-0.765696	-0.908679	-0.092255	0.815294	-0.539167	0.113507	-0.722192	-0.642764	-0.524367	-1.30164	1.47578	2.49087	0.821918	0.0797902
CXCL16	0.501921	-0.969981	-0.977203	-0.966344	-0.31991	1.05533	0.023105	-0.26173	-0.463337	-0.588635	-0.657318	-1.09487	2.08766	1.79701	0.920033	-0.0857284
Cystatin C	-0.266772	-1.4658	-1.55553	-1.5698	0.132679	1.15485	0.536594	0.365356	-0.19053	-0.253306	-0.107811	-0.602752	1.81121	1.45607	0.493743	0.0617978
DKK-1	0.595343	-1.10195	-1.18703	-1.20144	-0.36251	0.911546	0.346186	-0.221013	-0.550679	-0.715557	-0.17654	-1.1396	1.5672	1.89058	1.10115	0.244316
DPPIV/CD26	0.814731	-1.06225	-1.12792	-1.14285	-0.351184	0.530213	0.264255	-0.321224	-0.218281	-0.639586	-0.496192	-1.19727	2.1023	1.66415	0.711082	0.470041
EGF	1.543	-1.01985	-1.13197	-1.24446	-0.232793	1.1951	0.623402	-0.10507	-0.494777	-0.757377	-0.102603	-1.2737	1.50834	1.38018	0.394906	-0.282316
Endoglin/CD105	2.15831	-0.483533	-0.329744	-0.786315	-0.197389	1.06155	1.03457	-1.17678	-0.430771	-0.531199	0.635411	-2.0637	0.204621	0.757274	0.114237	0.0334447
Endostatin	1.20902	-1.1856	-1.29492	-1.19506	-0.406279	0.861089	0.389103	-0.0740158	-0.146144	-0.664048	-0.582411	-1.08366	1.76333	1.50275	0.777137	0.129707
Fetuin A/AHSG	1.22363	-1.35443	-1.67851	-1.65101	-0.349757	0.943758	0.817073	0.606327	-0.137588	-0.546441	-0.193287	-0.801944	1.18678	1.10197	0.649819	0.183608
FGF acidic	-0.0304261	-0.628475	-0.606991	-0.805607	0.0503521	0.376795	-0.114534	0.0907949	-0.896375	-0.900672	-0.558224	-1.07915	1.22341	2.78725	1.02984	0.0620069
FGF-21	0.118689	-1.16891	-1.38301	-1.40508	0.0397473	0.685449	0.607981	0.837109	-0.115557	-0.623929	-0.488279	-1.13083	1.21896	2.01813	0.842309	-0.0527883
Flt-3 Ligand	0.585123	-0.653313	-0.739374	-0.903603	-0.17468	0.62348	0.290867	0.152602	-0.669306	-0.820242	-0.765061	-1.24612	0.668069	2.7343	1.06618	-0.148924
Gas 6	-0.148993	-0.769806	-0.814233	-0.859224	-0.271744	0.10945	-0.129785	-0.148891	-0.634293	-0.545954	-0.472355	-0.930999	1.38949	2.80664	1.06513	0.355566
G-CSF	1.3051	-1.0913	-1.19388	-1.35868	-0.00467715	1.02054	0.843654	0.486311	-0.675232	-0.467916	-0.405882	-1.63725	1.06001	1.31262	0.679484	0.127089
GDF-15	0.810574	-0.828203	-0.894445	-1.07574	-0.286724	0.666308	0.0784306	-0.147479	-0.413029	-0.613108	-0.465463	-1.43259	2.35549	1.53364	0.652934	0.0594076
GM-CSF	1.65165	-0.43225	-0.465723	-0.514278	-0.201249	0.547718	0.510011	-0.328657	-0.789998	-1.12684	-0.290289	-2.16396	1.23768	1.2386	1.07984	0.0477448
HGF	1.26155	-1.38176	-1.42671	-1.43149	-0.169308	1.05512	1.34764	0.456034	-0.450798	-0.617007	0.122221	-1.18092	0.946747	1.11801	0.329184	0.021499
ICAM-1/CD54	1.77889	-0.77829	-0.905058	-1.0976	-0.312783	1.38061	1.1838	-0.0687027	-0.965844	-0.632403	-0.130528	-1.54264	1.03625	0.947206	0.265258	-0.158167
IFN-gamma	0.744488	-1.12755	-1.12263	-1.16767	-0.560904	0.316577	0.0834404	-0.277807	-0.506777	-0.449047	-0.288993	-0.913818	2.14098	1.72932	0.944818	0.455573
IGFBP-1	1.54035	-0.413471	-1.72284	-1.72606	-0.391097	1.25853	0.857699	0.163739	0.823305	-0.718618	-0.258041	-0.324331	0.685607	1.2114	-0.161641	-0.824539
IGFBP-2	1.25514	-1.42992	-1.59958	-1.51108	-0.470787	0.893967	0.797518	0.708135	0.0865428	-0.475701	-0.158086	-1.03425	1.40387	0.941723	0.390962	0.201542
IGFBP-3	-0.109464	-0.888335	-0.973746	-1.15722	0.262388	0.7632	0.893996	0.722528	-0.946962	-0.92117	-0.455326	-1.02523	1.38042	2.12517	0.643912	-0.314164
IGFBP-5	0.00477983	-0.802969	-0.835272	-0.883213	-0.0173073	0.309319	0.403318	0.112533	-0.314142	-1.1413	-0.62319	-1.33295	1.49632	2.27239	1.27733	0.0743514
IGFBP-6	-0.259355	-0.801041	-0.846737	-0.905541	-0.273814	-0.0847093	-0.315198	-0.0238967	-0.548198	-0.593496	-0.467524	-0.723467	1.07184	2.73742	1.50007	0.533651
IL-1 alpha/IL-1F1	0.216003	-0.973333	-0.99823	-1.11595	-0.0721945	0.377874	0.250987	0.0591356	-0.708031	-0.553645	-0.303513	-1.00023	1.04877	2.75407	0.981368	0.0369203
IL-1 beta/ IL-1F2	0.726356	-0.935382	-1.02957	-1.20003	0.0669054	0.690856	0.725236	1.62646	-0.936341	-0.733821	-0.811295	-1.30604	0.743785	1.58809	0.767851	0.016935
IL-1ra/IL-1F3	1.07678	-1.30138	-1.43189	-1.59466	-0.114795	0.992245	0.749369	0.49451	-0.644602	-0.823537	-0.168718	-0.782906	1.29227	1.35132	0.685729	0.220267
IL-2	0.818043	0.583584	0.47328	0.0332793	0.0710283	-0.0558984	-0.16118	-1.38439	-0.750446	-0.657285	-1.0469	-2.20828	0.827221	1.49475	1.00523	0.957957
IL-3	1.90611	0.130656	0.204793	-0.239362	0.0551862	0.297589	0.177471	-1.18648	-1.141	-1.11401	-0.467105	-1.9825	0.833874	1.19906	0.572479	0.75324
IL-4	0.592518	-1.12743	-1.24087	-1.24225	-0.190509	0.175746	0.0871928	0.230757	-0.579608	-0.729679	-0.288354	-0.940496	1.6677	2.01424	1.1449	0.426144
IL-5	1.35927	-1.26173	-1.31733	-1.3101	-0.0363639	0.949915	0.544039	0.0972727	-0.769301	-0.278677	-0.116855	-1.26257	1.45002	1.52477	0.441232	-0.0135967
IL-6	1.63451	-0.974718	-0.9998	-1.00786	-0.649938	1.05507	0.799123	-0.265657	1.52301	-0.596479	0.246045	-1.8231	0.447248	0.865031	0.0717551	-0.324242
IL-7	0.105894	-1.1941	-1.24926	-1.272	-0.317396	0.134231	-0.0687067	0.253364	-0.201675	-0.469818	-0.467717	-0.657381	2.44282	1.46323	0.912154	0.586359
IL-10	-0.385277	-0.803897	-0.849881	-0.892716	-0.181706	-0.0313004	-0.0568977	-0.113915	-0.598156	-0.669721	-0.515893	-0.729306	2.00746	2.3874	1.08708	0.34673
IL-11	0.0662132	-0.91532	-1.00185	-1.05525	-0.252898	-0.129437	-0.135042	-0.0611377	-0.511061	-0.636417	-0.489696	-0.737622	1.7585	2.38581	1.19846	0.516747
IL-12p40	-0.190246	-0.753733	-0.765099	-0.804716	-0.190419	-0.145961	-0.329781	-0.184918	-0.583708	-0.539649	-0.428312	-0.698585	0.657901	2.89675	1.62691	0.433561
IL-13	-0.0567388	-0.823851	-0.818381	-0.856787	-0.129598	-0.210386	-0.283935	-0.190436	-0.705897	-0.625086	-0.423999	-0.228153	1.17233	3.05676	0.926377	0.197786
IL-15	-0.287997	-0.82104	-0.866728	-0.885313	-0.355289	-0.1655	-0.354301	-0.271454	-0.611074	-0.525088	-0.455941	-0.616321	2.35253	1.87442	1.20923	0.779877
IL-17A	0.835657	0.402746	0.249629	0.0494194	-0.242871	0.796852	0.156365	-1.59659	-1.05252	-1.0937	-0.646842	-1.81758	1.69872	1.10164	0.651101	0.507981
IL-22	1.86209	-0.841429	-0.702985	-0.932756	-0.0241977	0.536296	0.613488	-0.616169	-0.869499	-0.904286	0.188331	-1.53445	0.443666	1.89537	0.810778	0.0757508
IL-23	1.80451	-1.09117	-1.11395	-1.23939	-0.0436991	0.852269	0.415824	0.107146	-0.937556	-0.753587	-0.242156	-1.20445	1.15425	1.46366	0.625784	0.202516
IL-27p28	1.81841	-0.808016	-1.2719	-1.1963	0.114801	1.46169	1.16515	0.699622	-0.754864	-0.960229	-0.399868	-1.10175	0.290326	0.920194	0.325976	-0.303246
IL-28	2.17263	-1.32078	-1.56494	-1.22298	0.152475	1.14236	0.669896	1.07421	-0.401281	-0.276095	-0.103989	-0.611564	0.562824	0.476183	-0.0477326	-0.701206
IL-33	0.0996482	-1.18138	-1.21879	-1.25122	0.0251145	0.142717	-0.126414	0.222345	-0.557902	-0.517455	-0.513455	-0.80278	1.3668	2.12306	1.40866	0.781059
LDL R	0.634604	-1.15809	-1.23114	-1.24415	-0.199692	0.141096	-0.131691	0.273893	-0.381489	-0.568382	-0.483571	-0.812138	2.33675	1.53169	0.781882	0.510432
Leptin	-0.0729936	-0.847354	-0.888686	-0.935715	-0.172855	-0.133712	-0.123874	0.172703	-0.662481	-0.784288	-0.40903	-0.875128	1.50052	2.59248	1.14676	0.493652
LIF	0.0474808	-1.00767	-1.14949	-1.11783	-0.232866	-0.187947	-0.221982	-0.0753965	-0.540985	-0.53251	-0.309199	-0.683491	1.6071	2.25017	1.36084	0.793776
Lipocalin-2/NGAL	0.881528	-1.70813	-1.88169	-1.78761	0.128846	0.496328	0.887927	0.666631	-0.0505074	-0.401873	0.0953011	-0.282445	0.985633	1.20138	0.618849	0.149839
LIX	0.553555	-1.12901	-1.09199	-1.20449	-0.53552	-0.00248244	0.195023	-0.0387888	-0.619633	-0.825999	-0.354505	-0.609825	1.72178	2.01398	1.02103	0.906868
M-CSF	0.659732	-0.885144	-0.885697	-0.980722	-0.0698266	0.0130525	-0.107408	0.180103	-0.712112	-0.767636	-0.586446	-0.655888	2.6753	1.6761	0.0663979	0.380194
MMP-2	0.784356	-0.983734	-1.0256	-1.08965	-0.167506	0.0591172	-0.143666	0.256168	-0.501869	-0.492019	-0.658054	-0.621879	2.29427	2.11217	0.0362319	0.141657
MMP-3	1.07424	-0.809757	-0.873767	-1.16732	-0.0868894	0.739245	0.536746	1.21709	-1.14126	-0.714015	-0.0756577	-1.07441	0.229999	2.36698	0.0996887	-0.320903
MMP-9	-0.254658	-1.64654	-1.722	-1.70437	0.454042	0.861522	0.982753	0.917726	-0.0676318	-0.26918	-0.0850246	-0.480019	1.15966	1.33965	0.331867	0.182209
Myeloperoxidase	0.849339	-1.48749	-1.67815	-1.58694	1.17646	1.10038	0.136249	0.659181	0.00121819	-0.177979	-0.306742	-0.682454	0.99965	1.40858	-0.0961977	-0.315096
Osteopontin (OPN)	1.40046	-1.28884	-1.30286	-1.53128	0.303391	1.19929	0.628829	0.559515	-0.339444	-0.752006	0.346854	-1.22159	0.662855	1.49655	0.154794	-0.316516
Osteoprotegerin/ TNFRSF11B	2.20918	-1.16573	-0.917315	-1.39291	-0.339477	1.1319	0.569416	0.0520082	-0.860641	-0.347153	0.317898	-1.06627	0.71608	1.27301	-0.0316132	-0.148389
PD-ECGF/ Thymidine phosphorylase	1.40056	-0.862422	-1.53894	-1.76862	0.176749	1.01527	0.738992	0.986306	-0.0733179	-0.632684	-0.531419	-1.08872	1.0987	1.05455	-0.0981494	0.123145
PDGF-BB	0.501564	-1.32442	-1.50639	-1.47413	0.124388	0.302056	0.48509	1.49057	-0.766692	-0.615971	-0.116494	-0.787725	0.754275	1.51639	1.21567	0.201826
Pentraxin 2/SAP	1.79033	-0.812302	-0.915798	-1.08689	-0.000651861	0.243445	0.0852601	1.0341	-0.892732	-0.782751	-0.493927	-1.38273	0.77884	1.88634	0.495632	0.053837
Pentraxin 3/ TSG-14	0.0166871	-0.938678	-0.95118	-1.03274	-0.388567	-0.0200984	-0.306452	0.012668	-0.527993	-0.644118	-0.50055	-0.7457	2.23014	1.77325	1.35568	0.667659
Periostin/OSF-2	1.95682	-0.460111	-0.307034	-0.186395	-0.206961	0.771959	0.275321	-0.605873	-1.03129	-1.5409	-0.569294	-1.51895	0.984114	1.38441	0.872447	0.181736
Pref-1/DLK-1/FA1	1.27197	-1.08946	-1.21464	-1.35002	0.100049	0.504259	0.116387	0.975514	-0.627246	-0.729589	-0.660365	-0.767429	1.88745	1.46303	0.118767	0.00133627
Proliferin	1.4129	-1.12947	-1.38339	-1.40568	0.408551	0.73508	0.142324	0.980335	-0.532422	-0.621749	-0.823128	-0.500499	1.59102	1.40274	-0.0536148	-0.222999
Proprotein Convertase 9/ PCSK9	0.388168	-1.16988	-1.25187	-1.32637	-0.0973791	0.375338	-0.0221876	0.670788	-0.622966	-0.509751	-0.470791	-0.720662	1.16023	2.45233	0.845427	0.299576
RAGE	1.08293	-1.30822	-1.46737	-1.50728	-0.351489	0.818603	-0.0518171	0.180057	-0.273364	-0.419367	-0.0558683	-0.646157	1.83395	1.54822	0.654964	-0.0377966
RBP4	1.41293	-1.30879	-1.50329	-1.51387	0.112076	1.30209	0.328812	0.858928	-0.459023	-0.547905	-0.15445	-0.917068	0.805357	1.35341	0.504243	-0.273456
Reg3G	1.71933	-0.177306	-1.30333	-1.52962	0.150935	1.31022	0.213794	0.866281	-0.852449	-0.700344	-0.255159	-1.26273	0.6853	1.38218	0.151328	-0.398425
Resistin	2.07779	-0.998166	-0.855549	-1.29748	-0.592534	1.3877	0.951838	0.583411	-1.32228	-0.240384	-0.158482	-0.774681	0.420124	1.03813	0.0283151	-0.247747
E-Selectin/CD62E	2.59725	-1.14227	-1.0496	-0.922559	1.03036	0.723495	-0.11975	0.93668	-0.99002	-0.431892	-0.390802	0.414568	0.581288	-0.195349	-0.755587	-0.285817
P-Selectin/CD62P	1.45441	-0.933371	-0.979915	-1.30966	0.0681576	1.23704	0.876815	1.50772	-0.670487	-1.45568	-0.416029	-0.775625	0.645354	0.660869	0.574632	-0.484231
Serpin E1/PAI-1	0.10089	-0.912057	-0.958127	-1.03039	-0.222714	0.246609	-0.278037	0.0932007	-0.697357	-0.760214	-0.498617	-0.761912	2.25815	1.73395	1.3726	0.314026
Serpin F1/PEDF	0.803506	-1.08435	-1.27478	-1.26593	0.256708	0.802496	0.102638	0.93455	-0.874053	-0.720993	-0.796695	-0.86561	1.42253	1.66147	0.950022	-0.0515123
Thrombopoietin	1.99538	-0.957521	-0.883336	-1.07233	0.38632	1.07364	-0.781521	1.29672	-0.503244	-0.443236	-1.01008	-0.78007	0.973075	1.16358	-0.0126321	-0.444753
TIM-1/KIM-1/ HAVCR	0.374828	-0.992646	-1.10242	-1.1341	-0.0505458	0.527492	-0.124828	0.695996	-0.817876	-0.556556	-0.815915	-0.811991	1.10155	2.38367	1.17021	0.153123
TNF-alpha	0.493695	-1.07812	-1.10217	-1.1822	-0.301114	0.260725	-0.209539	0.266239	-0.681625	-0.502045	-0.495292	-0.690758	1.42832	2.33756	1.32156	0.134755
VCAM-1/CD106	1.58325	-1.47303	-1.47559	-1.56601	0.0825216	1.48838	0.625621	0.908105	-0.414729	-0.54104	2.35655e-05	-0.650535	0.399317	1.01873	0.299324	-0.284346
VEGF	0.968	-1.15929	-1.24403	-1.35171	0.138818	0.58932	-0.0842394	0.472277	-0.706966	-0.517033	-0.376748	-0.962396	1.8743	1.74635	0.590822	0.0225261
WISP-1/CCN4	1.03841	-1.11687	-1.27244	-1.26817	0.389737	0.90967	-0.112007	1.18158	-0.763898	-0.606541	-0.456807	-1.08821	1.13974	1.81239	0.339122	-0.125694
