# Supplementary material for: Macrophages secrete murinoglobulin-1 and galectin-3 to regulate neutrophil degranulation after myocardial infarction
Source: Royal Society of Chemistry journal article supplement (doi:10.1039/d1mo00519g), 2022-03-01
Supplement: d1mo00519g3.xlsx [file d1mo00519g3.xlsx]

## Sheet: data_normalized
Supplementary Table 3. Protein expression in RnD array of secretome from neutrophils stimulated with IL-1b and IL-1b+ MUG1. Values are normalized intensity units.
	1IL-1B	1IL-1B	1IL-1B	1IL-1B	1IL-1B	1IL-1B	1IL-1B	1IL-1B	3IL-1B + MUG-1	3IL-1B + MUG-1	3IL-1B + MUG-1	3IL-1B + MUG-1	3IL-1B + MUG-1	3IL-1B + MUG-1	3IL-1B + MUG-1	3IL-1B + MUG-1
Label	M1	M2	M3	M4	F1	F2	F3	F4	M1	M2	M3	M4	F1	F2	F3	F4
Adiponectin/Acrp30	1.89146	1.29291	0.562308	0.924021	-0.611826	-1.15583	-0.959186	-0.106575	1.45654	0.113036	0.402981	-0.904642	-0.781214	-1.24626	-0.809907	-0.0678204
Amphiregulin	2.54668	1.11421	0.45507	0.314937	-0.545321	-1.02151	-0.778875	0.0554326	1.15963	0.143664	0.361648	-0.960528	-0.770506	-1.12661	-0.851536	-0.0963776
Angiopoietin-1	2.03489	1.37763	0.524727	0.540012	-0.566622	-1.16274	-0.840223	0.194571	1.40209	0.145659	0.296981	-1.00836	-0.798541	-1.21623	-0.875379	-0.0484601
Angiopoietin-2	1.90067	1.44565	0.521722	0.638948	-0.517884	-1.22124	-0.891155	0.24254	1.52122	-0.0443539	0.193182	-0.915834	-0.759908	-1.16571	-0.935885	-0.0119626
Angiopoietin-like 3	3.11942	0.677237	0.0890938	0.323939	-0.615442	-0.980071	-0.0705598	0.0870338	0.885302	-0.227123	-0.0818901	-0.733895	-0.58449	-1.03466	-0.733895	-0.120001
BAFF/BLyS/TNFSF13B	1.98744	1.29762	0.307404	0.647543	-0.671687	-1.26296	-0.889439	0.345551	1.68544	-0.102669	-0.0327344	-0.622414	-0.605693	-1.25819	-0.840167	0.0149486
C1q R1/CD93	2.00951	1.34279	0.267904	0.606142	-0.780959	-1.27856	-0.906172	0.321567	1.69403	-0.366292	-0.0865953	-0.431338	-0.322337	-1.26718	-0.802099	-0.000409585
CCL2/JE/MCP-1	2.13689	1.41015	0.159001	0.201084	-0.59687	-1.24268	-0.847747	0.427683	1.6756	-0.423683	-0.282868	-0.413972	-0.131969	-1.27829	-0.828325	0.0359898
CCL3/CCL4 MIP-1 alpha/beta	1.70179	1.32834	0.127976	-0.0387409	-0.657261	-1.31579	-1.01404	0.723156	1.92685	-0.178783	-0.335497	-0.352169	-0.0540789	-1.41582	-0.732284	0.286357
CCL5/RANTES	1.78293	1.12307	-0.205987	-0.0768165	-0.654193	-1.39653	-1.21601	0.376058	2.01014	0.12083	-0.196649	-0.210656	0.047296	-1.53037	0.136393	-0.109498
CCL6/C10	1.53257	0.417901	-0.0607096	-0.486054	-0.403805	0.406935	-0.791551	1.08764	2.55951	-0.269857	-0.273774	-1.02733	-0.598038	-1.10175	-0.870666	-0.121025
CCL11/Eotaxin	1.99735	1.37686	0.644801	0.279537	-0.527407	-1.10052	-0.871275	-0.0154254	1.55109	0.197009	0.290235	-1.13567	-0.73145	-1.20444	-0.753596	0.00291428
CCL12/MCP-5	2.33695	1.20504	0.442387	0.328771	-0.517674	-1.0673	-0.869886	-0.131377	1.50612	0.155505	0.125681	-1.01049	-0.666668	-1.14257	-0.722185	0.0276861
CCL17/TARC	2.15568	1.42446	0.349565	0.456323	-0.519126	-1.1275	-0.852563	0.0980247	1.46833	0.122886	0.0717008	-0.966633	-0.693814	-1.18015	-0.854025	0.0468393
CCL19/MIP-3 beta	2.27646	1.21672	0.294806	0.383629	-0.653141	-1.13401	-0.545942	0.135539	1.56435	0.0650938	-0.0329169	-0.918076	-0.63337	-1.27796	-0.855288	0.114099
CCL20/MIP-3 alpha	2.20786	1.36475	0.386483	0.394528	-0.543513	-1.23216	-0.794515	-0.134829	1.65598	-0.0543798	-0.0865596	-0.648097	-0.41518	-1.21446	-0.81865	-0.0672517
CCL21/6Ckine	2.14979	1.32525	0.370526	0.41553	-0.587415	-1.18532	-0.902442	0.126219	1.6676	-0.204881	-0.185594	-0.476512	-0.334219	-1.30587	-0.910478	0.0378184
CCL22/MDC	2.16225	1.36467	0.117774	0.481581	-0.528995	-1.21308	-0.891248	0.0462562	1.70516	-0.239815	-0.328434	-0.365748	-0.228978	-1.31103	-0.829059	0.0586941
CD14	2.19878	1.18863	0.00353703	0.27585	-0.603463	-1.2348	-1.02182	0.31084	1.67545	-0.151636	-0.449811	-0.279425	-0.075875	-1.35803	-0.773849	0.295627
CD40/TNFRSF5	1.92913	1.26566	-0.0142325	0.266403	-0.672833	-1.36388	-1.05729	0.118785	1.79935	0.313446	-0.10994	-0.291623	0.0918249	-1.3509	-0.945358	0.0214552
CD160	2.2042	1.32374	0.582924	-0.102041	-0.503319	-1.08686	-0.782597	-0.106451	1.47955	0.291887	0.400659	-1.11626	-0.680087	-1.1045	-0.785536	-0.015318
Chemerin	2.10067	1.33008	0.653105	0.136014	-0.509269	-1.10702	-0.801662	-0.0613154	1.48996	0.344867	0.213794	-1.06093	-0.759733	-1.20208	-0.839112	0.0726384
Chitinase 3-like 1	2.09971	0.739066	0.109215	-0.122117	-0.552182	-0.0117085	-0.938084	1.20699	1.61918	-0.168383	-0.218855	-1.20727	-0.763366	-1.29875	-0.890766	0.397327
Coagulation Factor III/ Tissue Factor	1.96209	1.44151	0.532456	0.266732	-0.535104	-1.20019	-0.803937	-0.0145323	1.58914	0.263624	0.179711	-1.04014	-0.613376	-1.27012	-0.802383	0.0445176
Complement Component C5/C5a	2.20775	1.38315	0.392098	0.234813	-0.537869	-1.15021	-0.817318	-0.179015	1.56334	0.259246	0.129447	-0.905886	-0.484911	-1.20519	-0.805101	-0.0843384
Complement Factor D	2.19076	1.51466	0.367388	0.128576	-0.5685	-1.19942	-0.862175	-0.0247163	1.56145	-0.0327843	-0.0763515	-0.670156	-0.40701	-1.26396	-0.762132	0.104372
C-Reactive Protein/CRP	2.07512	1.54262	0.372811	0.117549	-0.589072	-1.24329	-0.86631	-0.196881	1.759	-0.0312136	-0.0768566	-0.507929	-0.427749	-1.22469	-0.660072	-0.043047
CX3CL1/Fractalkine	2.4434	1.12844	0.184133	0.185671	-0.564853	-1.28616	-0.890901	-0.128073	1.66519	-0.286483	-0.340311	-0.343387	-0.352015	-1.29231	-0.146528	0.0241854
CXCL1/KC	2.18351	1.3397	0.0407844	0.0877527	-0.573042	-1.16743	-1.03949	-0.0596305	1.91466	-0.0968811	-0.390028	-0.458051	0.0133971	-1.00062	-0.783589	-0.0110426
CXCL2/MIP-2	2.10935	1.24549	-0.109496	-0.0327087	-0.597418	-1.29331	-0.994154	-0.00391337	1.84219	0.244047	-0.130293	-0.287068	0.0650995	-1.3093	-0.830981	0.0824728
CXCL9/MIG	2.13863	1.36343	0.658706	-0.502017	-0.631907	-1.01329	-0.734162	-0.0971458	1.43805	0.336744	0.579943	-1.11692	-0.634878	-1.11278	-0.706525	0.0341265
CXCL10/IP-10	2.15356	1.33205	0.55161	-0.265337	-0.555908	-1.17052	-0.192313	-0.167972	1.38073	0.338626	0.443597	-1.19942	-0.761894	-1.2192	-0.844958	0.177367
CXCL11/I-TAC	2.03354	1.11124	0.308148	-0.098817	-0.478089	-1.00185	-0.687592	-0.299891	2.20451	0.0757687	0.132358	-0.92238	-0.617589	-1.0175	-0.761038	0.0191788
CXCL13/BLC/BCA-1	2.02088	1.49747	0.487153	-0.0164832	-0.535335	-1.19873	-0.880728	-0.115385	1.55377	0.236095	0.231531	-1.0831	-0.601781	-1.20939	-0.597719	0.211751
CXCL16	2.15666	1.32435	0.464052	-0.0220765	-0.525883	-1.17405	-0.826398	-0.0574313	1.56594	0.257816	0.190052	-1.06357	-0.585131	-1.16374	-0.774839	0.234246
Cystatin C	2.10547	1.072	0.292021	-0.117468	-0.596597	-0.987979	-0.840341	0.851934	1.56366	0.0204213	0.0468849	-1.17044	-0.533349	-1.23451	-0.875161	0.403446
DKK-1	2.02516	1.28646	0.303013	-0.168686	-0.554352	-1.2174	-0.899969	-0.0559531	1.43183	0.0760634	0.851846	-1.03199	-0.485318	-1.21592	-0.843602	0.498813
DPPIV/CD26	2.13934	1.43367	0.283796	0.0254694	-0.546315	-1.21891	-0.804642	-0.0643149	1.70774	-0.00130837	-0.0375371	-0.825119	-0.400943	-1.21103	-0.744786	0.264894
EGF	2.26562	1.34056	0.22895	0.0578143	-0.552725	-1.22185	-0.868787	-0.0871117	1.70134	-0.114864	-0.167284	-0.619021	-0.219673	-1.20798	-0.759322	0.224325
Endoglin/CD105	2.17261	1.20677	-0.00843348	0.0148399	-0.576969	-1.25356	-1.01916	-0.0948775	1.88336	0.18939	-0.206257	-0.507149	-0.0596848	-1.16878	-0.763156	0.191053
Endostatin	1.90687	1.39864	-0.129098	-0.17779	-0.56581	-1.22621	-1.03143	-0.121489	1.94491	0.335005	0.0382837	-0.422776	0.0054922	-1.26881	-0.86101	0.175232
Fetuin A/AHSG	1.99923	0.983454	-0.435672	-0.186547	-0.635863	-1.1964	-1.19788	0.034404	1.5692	0.634975	0.629043	-0.322973	0.154207	-1.44107	-0.965064	0.376952
FGF acidic	2.12687	1.27846	0.678045	-0.39516	-0.570643	-1.02458	-0.946265	-0.0108363	1.43509	0.261816	0.54462	-1.18846	-0.617705	-1.11015	-0.676513	0.215407
FGF-21	2.14873	1.46914	0.622504	-0.274101	-0.511101	-1.1393	-0.925139	-0.0542326	1.07081	0.636781	0.408347	-1.14215	-0.669906	-1.12216	-0.748102	0.229883
Flt-3 Ligand	2.03281	1.54922	0.502712	-0.115614	-0.462955	-1.16961	-0.73394	-0.16502	1.41149	0.372459	0.285624	-1.11572	-0.716633	-1.19057	-0.765381	0.281133
Gas 6	2.10562	1.41171	0.37894	-0.055676	-0.490292	-1.16653	-0.910176	-0.0468363	1.55903	0.264025	0.218353	-1.02509	-0.624876	-1.20778	-0.686238	0.275811
G-CSF	2.10159	1.39106	0.374676	0.0609771	-0.531913	-1.20009	-0.936584	-0.0174475	1.43498	0.393498	0.214689	-0.936584	-0.632328	-1.27852	-0.782872	0.344874
GDF-15	2.10355	1.47864	0.343254	-0.0889144	-0.512047	-1.23634	-0.890006	0.0631726	1.51779	0.347771	0.0390796	-0.996919	-0.452176	-1.17159	-0.787611	0.242364
GM-CSF	2.08179	1.48559	0.239993	-0.185639	-0.536159	-1.20903	-0.858513	-0.259186	1.74848	0.166446	0.172706	-0.717679	-0.41861	-1.21686	-0.697336	0.204002
HGF	2.11209	1.44673	0.137675	-0.105258	-0.499831	-1.30909	-0.922256	0.0742339	1.64324	0.102086	-0.0851427	-0.453411	-0.463623	-1.29826	-0.781448	0.402271
ICAM-1/CD54	2.28296	1.31785	0.115812	-0.129019	-0.596567	-1.22839	-0.921955	-0.129019	1.65746	0.0273569	-0.190621	-0.315406	-0.28083	-1.2663	-0.748204	0.40487
IFN-gamma	2.14013	1.28056	-0.0103622	-0.0446206	-0.550711	-1.30128	-0.930667	0.037911	1.84271	-0.0290486	-0.265743	-0.237713	-0.198052	-1.26858	-0.795191	0.330665
IGFBP-1	1.94966	1.28654	-0.138345	-0.320438	-0.611788	-1.27643	-1.06399	-0.0913038	1.892	0.318407	0.071063	-0.264293	-0.0280111	-1.28402	-0.84244	0.403384
IGFBP-2	1.83623	1.11167	-0.458208	-0.29089	-0.657534	-1.31953	-1.13621	0.0568408	1.4885	0.865787	0.745027	-0.363637	0.0625442	-1.38209	-0.952887	0.394387
IGFBP-3)	2.31039	1.3217	0.678443	-0.511516	-0.584953	-1.06366	-0.835184	-0.122569	1.24554	0.17798	0.459491	-1.15749	-0.306108	-1.13029	-0.68015	0.19838
IGFBP-5	2.10404	1.56914	0.675184	-0.357667	-0.579309	-0.979743	-0.836414	-0.0887418	1.12881	0.453542	0.335333	-1.2073	-0.666607	-1.16444	-0.740369	0.354542
IGFBP-6	2.08066	1.50574	0.555811	-0.167944	-0.521066	-1.17624	-0.826035	-0.0599642	1.30875	0.418648	0.189556	-1.19083	-0.75525	-1.19521	-0.51377	0.347148
IL-1 alpha/IL-1F1	1.29864	0.890132	0.170474	-0.290229	-0.547178	-0.977769	-0.882416	2.69681	0.631176	0.0961992	-0.0573682	-0.851301	-0.633999	-1.02093	-0.699742	0.1775
IL-1 beta/ IL-1F2	1.46686	1.08683	-1.13918	1.18839	0.843912	-0.415517	-0.955514	-0.617804	1.02927	0.457112	-1.27545	-0.400282	0.842092	-1.19335	-1.22297	0.305608
IL-1ra/IL-1F3	2.00149	1.12822	0.364857	0.777403	-0.604775	-1.23714	-1.10615	0.196225	1.3917	0.178158	0.0396388	-0.842667	-0.541885	-1.36061	-0.87278	0.48832
IL-2	2.14816	1.4013	0.370372	-0.170624	-0.569589	-1.25581	-0.946212	-0.275951	1.63908	0.223553	0.177273	-0.58076	-0.460002	-1.23825	-0.69247	0.229936
IL-3	2.28209	1.31306	0.190162	-0.155219	-0.572621	-1.2732	-0.870532	-0.299263	1.66335	0.196709	-0.0619168	-0.423666	-0.426579	-1.30758	-0.513694	0.25891
IL-4	2.21861	1.33641	0.222457	-0.0309244	-0.553138	-1.33028	-0.971836	0.00924592	1.62378	-0.0278343	-0.14989	-0.208601	-0.421426	-1.2932	-0.749354	0.325973
IL-5	2.22428	1.19194	0.0499772	-0.141873	-0.562117	-1.23055	-1.01434	0.0180022	1.78729	0.101746	-0.103808	-0.268251	-0.297439	-1.25186	-0.834666	0.331662
IL-6	1.96729	1.32809	-0.062103	-0.263626	-0.528124	-1.33421	-1.10278	-0.175459	1.75632	0.385025	0.166184	-0.314006	-0.0508776	-1.32319	-0.846152	0.39762
IL-7	1.87743	1.02462	-0.318685	-0.29639	-0.579265	-1.34149	-1.11436	-0.00794105	1.60849	0.641417	0.791912	-0.278275	-0.0648226	-1.41674	-0.972224	0.446331
IL-10	2.07449	1.43673	0.729687	-0.57552	-0.63067	-0.955911	-0.797533	0.0537505	1.04079	0.421415	0.637771	-1.29388	-0.671919	-1.13692	-0.74804	0.415758
IL-11	2.03265	1.63216	0.634559	-0.406421	-0.535098	-1.08017	-0.77221	-0.0825609	1.03505	0.426363	0.479858	-1.21463	-0.691737	-1.2074	-0.697028	0.446604
IL-12p40	1.80829	1.39884	0.679409	-0.270697	-0.560487	-1.09681	-0.775306	-0.0962469	1.59924	0.493424	0.31609	-1.1862	-0.687187	-1.26261	-0.759447	0.399711
IL-13	2.03113	1.46333	0.56145	-0.148669	-0.524702	-1.14943	-0.795866	-0.0797545	1.3255	0.461074	0.32774	-1.10748	-0.662876	-1.2498	-0.839312	0.387665
IL-15	2.07545	1.51638	0.546909	-0.173223	-0.617691	-1.16282	-0.992469	0.13806	1.22058	0.423015	0.186069	-0.870124	-0.660063	-1.29446	-0.75862	0.423015
IL-17A	1.92817	1.58078	0.568209	-0.195116	-0.590799	-1.26689	-0.86653	-0.168633	1.44837	0.43268	0.178757	-0.857184	-0.520682	-1.29649	-0.741906	0.367252
IL-22	1.97535	1.51713	0.499905	-0.192941	-0.603924	-1.27473	-0.969243	-0.0606703	1.49036	0.213319	0.287327	-0.588178	-0.548072	-1.36606	-0.756666	0.377082
IL-23)	2.02843	1.4943	0.256959	-0.204476	-0.506305	-1.31698	-0.947197	-0.144427	1.54803	0.207971	0.323329	-0.424132	-0.507396	-1.32172	-0.871345	0.38496
IL-27p28	2.01954	1.19965	0.0838398	-0.164438	-0.548403	-1.24993	-0.935254	-0.122577	2.05418	0.0174399	0.0217703	-0.253934	-0.439146	-1.27014	-0.715846	0.303248
IL-28	2.64186	0.515032	-0.121968	-0.158258	-0.483921	-1.0512	-0.717901	-0.129608	1.99914	-0.0904519	-0.203144	-0.294826	-0.363216	-1.01873	-0.711216	0.188414
IL-33	2.06266	1.24864	-0.233911	-0.028386	-0.519106	-1.25923	-0.959022	-0.296261	1.84905	0.696725	-0.00875719	-0.125375	-0.433259	-1.29156	-0.701538	-0.00067474
LDL R	1.81847	1.06479	-0.292386	-0.396244	-0.543611	-1.41237	-1.15974	0.0893638	1.46619	0.730759	0.97216	-0.427121	-0.153103	-1.43342	-0.766766	0.443044
Leptin	1.82828	1.57803	0.95648	-0.538221	-0.607583	-1.06592	-0.837433	-0.0200396	1.10201	0.260132	0.692629	-1.18561	-0.689527	-1.18289	-0.724548	0.434219
LIF	2.06625	1.3533	0.726681	-0.542247	-0.578875	-1.0472	-0.819579	0.0712864	1.05242	0.38394	0.640341	-1.21334	-0.742253	-1.20026	-0.71885	0.568392
Lipocalin-2/NGAL	2.47791	0.811786	1.01716	0.911404	0.13712	-0.959625	-0.0427597	-0.0838346	0.900073	-0.45398	-0.59845	-1.02053	-0.949192	-1.03469	-0.992674	-0.119716
LIX	1.93926	1.49641	0.694727	-0.299193	-0.640942	-1.2091	-0.796153	-0.162494	1.12334	0.459774	0.620681	-1.12509	-0.641184	-1.23758	-0.744891	0.522428
M-CSF	1.84363	1.46717	0.666238	-0.377669	-0.581651	-1.28809	-0.721139	-0.163188	1.1282	0.64674	0.618242	-1.0976	-0.623902	-1.28209	-0.81713	0.582245
MMP-2	1.78649	1.36827	0.493179	-0.311737	-0.603912	-1.35297	-0.930462	0.0864246	1.41124	0.478857	0.385762	-0.838799	-0.627516	-1.35297	-0.780077	0.788219
MMP-3	1.87745	1.48897	0.490247	-0.245818	-0.654743	-1.3971	-0.904817	-0.261546	1.43549	0.273202	0.645953	-0.643734	-0.524658	-1.30902	-0.725519	0.455646
MMP-9	0.202867	0.267888	0.47537	0.348616	0.0487163	2.5133	-0.872168	1.52666	0.0888977	-0.731533	-0.705963	-0.922943	-0.935304	-0.910158	-1.05006	0.655821
Myeloperoxidase	1.50829	1.12926	1.08352	1.00688	0.33141	-0.250197	-1.07241	0.611224	1.02886	-0.356538	-0.807447	-0.874579	-1.06209	-1.43302	-1.26608	0.422899
Osteopontin (OPN)	1.7845	1.06989	0.0348725	-0.30781	-0.632383	-1.41387	-0.582235	1.6661	1.34431	-0.0445296	0.0571608	-0.466614	-0.550948	-1.39854	-0.834371	0.274472
Osteoprotegerin/ TNFRSF11B	1.81983	1.35883	-0.0304784	-0.314044	-0.524738	-1.42296	-1.02058	-0.203152	1.73111	0.359226	0.688733	-0.523154	-0.323818	-1.32633	-0.675234	0.406751
PD-ECGF/ Thymidine phosphorylase	1.23193	1.10712	-0.215857	-0.418488	-0.456665	-1.54471	-1.00289	0.0176091	1.37729	0.950006	1.4419	-0.599094	-0.190719	-1.45954	-0.826687	0.588794
PDGF-BB	1.61713	1.25529	0.77804	0.162017	-0.784712	-1.2477	-0.972761	0.02325	1.34348	-0.011766	1.06984	-0.75618	-0.797473	-1.36961	-0.853447	0.544599
Pentraxin 2/SAP	1.60712	1.48923	0.991632	-0.588894	-0.562849	-1.23043	-0.791772	0.104728	1.13968	0.351471	0.873744	-1.25236	-0.681272	-1.22906	-0.679367	0.458393
Pentraxin 3/ TSG-14	1.67884	1.41757	0.833164	-0.627176	-0.60655	-1.15521	-0.829314	0.104369	1.06555	0.578773	0.804287	-1.21984	-0.68823	-1.31197	-0.686305	0.642027
Periostin/OSF-2	1.77022	1.53188	0.94496	-0.556604	-0.631086	-1.24035	-0.555114	-0.205047	1.09393	0.361019	0.800465	-1.19566	-0.660328	-1.38187	-0.415087	0.338674
Pref-1/DLK-1/FA1	1.60607	1.4994	0.726046	-0.425091	-0.574724	-1.36882	-0.848805	-0.0250821	1.11272	0.574932	0.666786	-1.08585	-0.573421	-1.31104	-0.792507	0.819382
Proliferin	2.07967	1.23256	0.589089	-0.41006	-0.638127	-1.32369	-0.889272	-0.12905	1.18641	0.344732	0.715341	-0.833613	-0.58521	-1.27753	-0.72501	0.663754
Proprotein Convertase 9/ PCSK9	1.63738	1.5079	0.50484	-0.26457	-0.716989	-1.33907	-1.01761	-0.135095	1.23109	0.350065	0.661103	-0.554773	-0.597307	-1.40455	-0.836047	0.97363
RAGE	0.395196	0.30445	-0.141968	-0.394715	-0.486069	3.49089	-0.683394	-0.241239	0.253901	-0.176682	0.0285604	-0.532964	-0.520978	-0.850268	-0.499467	0.0547486
RBP4	1.99272	1.16684	0.287834	-0.261736	-0.639756	-1.329	-0.999557	-0.17672	1.57674	0.307569	0.51252	-0.443914	-0.640545	-1.44437	-0.574475	0.665853
Reg3G	1.58621	1.39389	0.241581	-0.322653	-0.56583	-1.41298	-1.08238	0.00476122	1.61164	0.29403	0.640518	-0.472056	-0.489428	-1.42569	-0.807418	0.805814
Resistin	1.60002	1.18277	0.06132	-0.464504	-0.450544	-1.46031	-1.05703	0.0334001	1.58916	0.391705	1.01215	-0.559122	-0.232661	-1.4479	-0.867791	0.669353
E-Selectin/CD62E	1.32443	1.39338	1.13652	-0.48166	-0.637124	-1.38876	-0.291046	0.0523273	1.12436	-0.204527	1.15815	-1.09541	-0.690279	-1.35496	-0.796644	0.751242
P-Selectin/CD62P	1.3303	1.45927	1.11104	-0.603008	-0.624933	-1.27883	-0.82871	-0.0239196	0.868572	0.333335	1.26323	-1.1937	-0.595605	-1.25819	-0.673943	0.715095
Serpin E1/PAI-1	1.26515	1.36519	0.950916	-0.543295	-0.657445	-1.30515	-0.87805	0.0992801	1.09328	0.298081	1.19974	-1.12815	-0.636282	-1.28206	-0.745943	0.904743
Serpin F1/PEDF	1.43512	1.26434	0.717024	-0.556454	-0.747409	-1.34717	-0.797164	0.17509	1.05187	0.470935	1.09221	-1.03787	-0.633428	-1.3781	-0.731272	1.02228
Thrombopoietin	1.31162	1.16239	0.706503	-0.542059	-0.704975	-1.41551	-1.00069	0.297161	1.03918	0.294423	1.42388	-0.851462	-0.577558	-1.34705	-0.751522	0.955668
TIM-1/KIM-1/ HAVCR	1.35595	1.20435	0.472777	-0.549477	-0.783135	-1.32834	-0.938908	-0.0682529	0.959565	0.385155	1.45331	-0.631536	-0.618768	-1.45768	-0.645444	1.19044
TNF-alpha	1.30243	1.0523	0.346873	-0.421788	-0.690187	-1.40404	-1.02885	0.0700429	1.14364	0.456482	1.3474	-0.508912	-0.624858	-1.47993	-0.809632	1.24903
VCAM-1/CD106	1.50466	1.03614	0.214856	-0.369437	-0.689504	-1.42906	-1.0123	-0.0221298	1.25542	0.266612	1.2023	-0.42664	-0.606464	-1.45086	-0.749432	1.27585
VEGF	1.26245	1.04005	0.130385	-0.34597	-0.664497	-1.4106	-1.10929	0.161951	1.27536	0.182038	1.3758	-0.453581	-0.541061	-1.5096	-0.693193	1.29975
WISP-1/CCN4	1.20502	0.93155	0.00876311	-0.516619	-0.520661	-1.46231	-0.85475	0.0761198	1.15922	0.675595	1.68325	-0.759103	-0.437246	-1.4677	-0.775269	1.05414
