# Supplementary material for: Macrophages secrete murinoglobulin-1 and galectin-3 to regulate neutrophil degranulation after myocardial infarction
Source: Royal Society of Chemistry journal article supplement (doi:10.1039/d1mo00519g), 2022-03-01
Supplement: d1mo00519g4.xlsx [file d1mo00519g4.xlsx]

## Sheet: data_normalized
Supplementary Table 4. Protein expression in RnD array of secretome from neutrophils stimulated with Lgals3. Values are normalized intensity units.
	0Unstim	0Unstim	0Unstim	0Unstim	0Unstim	0Unstim	0Unstim	0Unstim	2Lgals3	2Lgals3	2Lgals3	2Lgals3	2Lgals3	2Lgals3	2Lgals3	2Lgals3
Label	M1	M2	M3	M4	F1	F2	F3	F4	M1	M2	M3	M4	F1	F2	F3	F4
Adiponectin/Acrp30	-0.411219	0.313357	-0.503193	1.11645	-0.103891	-1.1829	-0.823981	0.400844	-0.774629	0.483845	-0.220541	1.85	2.14835	-1.02139	-0.96082	-0.310272
Amphiregulin	-0.922491	0.507954	-0.618886	1.591	0.2423	-1.30492	-0.858267	-0.00583855	-0.954603	0.773608	0.0554662	2.02306	-0.399941	-0.975038	1.26113	-0.414537
Angiopoietin-1	-0.847123	0.782247	-0.403607	1.70388	0.530607	-1.32524	-0.652102	-0.051311	-1.00125	0.908067	-0.0922025	2.27007	-0.208586	-0.897451	-0.507409	-0.208586
Angiopoietin-2	-0.885173	0.526979	-0.488501	2.44052	0.304842	-0.590049	-0.897867	-0.212418	-0.951814	0.625353	-0.209244	1.94548	-0.237805	-1.0724	-0.342526	0.0446256
Angiopoietin-like 3	-0.904512	0.544103	-0.51654	1.72756	0.111472	-1.24783	-0.68401	-0.508167	-1.13897	1.63824	0.625047	1.72477	-0.379773	-0.896139	-0.189974	0.0947252
BAFF/BLyS/TNFSF13B	-0.856137	0.384003	-0.440659	1.48565	0.295871	-1.36289	-0.689316	-0.402888	-1.15201	1.18978	-0.151083	2.26939	-0.166821	-0.871875	-0.166821	0.635808
C1q R1/CD93	-0.857374	0.493562	-0.354621	1.52643	0.432	-1.36355	-0.812913	-0.269118	-1.1344	0.620105	-0.0878536	2.12153	-0.063913	-0.912096	-0.549566	1.21178
CCL2/JE/MCP-1	-1.2176	0.437606	-0.772651	1.46988	0.188435	0.341497	-0.790449	-0.388217	-1.32439	0.668978	-0.203119	2.17824	-0.448729	-1.01826	-0.27787	1.15664
CCL3/CCL4 MIP-1 alpha/beta	-0.842787	0.622142	-0.651259	1.32355	0.264968	-1.18443	-0.571025	-0.0119705	-0.979963	0.609201	-0.46232	1.54096	-0.387262	-0.791023	-0.666789	2.18801
CCL5/RANTES	-0.533727	-0.0791207	-0.320527	0.276767	-0.219319	-0.64572	-0.45077	-0.149634	-0.522113	0.0104734	-0.39187	0.124955	-0.343755	3.60253	-0.522943	0.164774
CCL6/C10	-0.808586	0.010513	-0.625752	0.287508	-0.426462	-0.932914	-0.767448	-0.492282	-0.352414	2.30874	0.00137126	2.45958	-0.175064	0.180549	-0.0187406	-0.648606
CCL11/Eotaxin	-0.866088	0.802732	-0.275665	1.91079	0.15839	-1.11412	-0.728592	-0.445513	-0.752856	0.915964	-0.181306	2.32597	-0.202874	-0.812168	-0.189394	-0.545265
CCL12/MCP-5	-0.863291	0.623785	-0.408328	1.71049	0.0856304	-1.16227	-0.496721	-0.590313	-0.964682	1.26853	0.249417	2.29285	-0.262741	-0.813895	-0.280939	-0.38753
CCL17/TARC	-0.822337	0.817538	-0.493265	1.69232	0.337642	-1.16786	-0.485038	-0.723616	-1.03898	1.24533	0.085353	2.16673	-0.361636	-0.882667	-0.164193	-0.205327
CCL19/MIP-3 beta	-0.885113	0.954217	-0.48728	1.79122	0.0397187	-1.22095	-0.404614	-0.776613	-0.975529	1.32105	0.0603853	2.00563	-0.231531	-0.856696	-0.298697	-0.0351979
CCL20/MIP-3 alpha	-0.820026	0.528115	-0.38236	1.77403	0.301295	-1.38867	-0.430279	-0.644321	-1.08199	0.857164	0.0840592	2.18933	-0.177902	-0.931839	-0.449447	0.57284
CCL21/6Ckine	-1.03052	0.657919	-0.251755	1.53067	0.00671346	-1.34941	-0.631065	-0.527007	-1.10436	0.923101	0.087275	2.16173	-0.248398	-0.906317	-0.265182	0.946598
CCL22/MDC	-0.861521	1.19701	-0.474122	1.23246	-0.0689977	-1.19322	-0.48425	-0.661491	-1.05649	1.35653	-0.117106	2.05284	-0.393097	-0.838733	-0.512102	0.822275
CD14	-0.905823	1.01893	-0.568524	1.16081	-0.0652514	-1.17352	-0.600647	-0.584585	-0.951332	1.24647	-0.183038	2.09775	-0.349011	-0.892438	-0.429321	1.17954
CD40/TNFRSF5	-1.13054	0.79136	-0.440935	1.418	0.0417886	-1.25947	-0.638822	-0.329999	-0.797731	1.29207	-0.189079	1.96969	-0.398959	-0.836709	-0.632825	1.14216
CD160	-0.852027	0.901533	-0.416894	1.77701	0.213658	-1.19596	-0.448161	-0.302248	-0.703508	1.13604	0.0703508	2.18348	-0.0990123	-0.987517	-0.680058	-0.596679
Chemerin	-0.988064	0.829126	-0.442377	1.90196	0.219864	-1.09667	-0.399994	-0.64105	-0.778796	1.08343	-0.0476814	2.17215	-0.275492	-0.900648	-0.0821179	-0.553634
Chitinase 3-like 1	-0.74593	0.276697	-0.631599	0.327511	-0.40203	-0.875687	-0.590767	-0.745023	-0.468269	2.87455	-0.0481483	1.50802	-0.30131	-0.323995	0.802075	-0.656099
Coagulation Factor III/ Tissue Factor	-0.844691	0.725056	-0.586378	1.53973	0.347522	-1.38781	-0.487027	0.105768	-0.953977	0.867459	-0.182351	2.46039	-0.0929346	-0.88112	-0.410858	-0.218779
Complement Component C5/C5a	-0.798533	0.824086	-0.360937	1.59068	0.255531	-1.23932	-0.475926	-0.753815	-1.01254	0.996569	0.159707	2.32852	-0.114989	-0.996569	-0.392878	-0.0095824
Complement Factor D	-0.776318	0.645919	-0.303319	1.84785	0.273351	-1.34003	-0.487983	-0.86055	-0.98366	0.966651	-0.0376617	2.10703	-0.241764	-0.957742	-0.309798	0.458015
C-Reactive Protein/CRP	-0.745759	0.529746	-0.276017	1.62353	0.334306	-1.27722	-0.522889	-0.858909	-1.03721	0.656611	-0.0565748	2.18585	-0.118293	-0.893197	-0.636038	1.09207
CX3CL1/Fractalkine	-1.01472	0.718472	-0.588182	1.12098	0.14775	-1.29708	-0.362897	-0.89457	-0.795444	0.919727	0.330981	2.30448	-0.299817	-0.882555	-0.501072	1.09395
CXCL1/KC	-0.940804	0.917892	-0.661035	1.03687	0.175057	-1.26559	-0.532405	-0.77037	-0.96653	1.21696	0.085016	2.1045	-0.233342	-0.834685	-0.509895	1.17837
CXCL2/MIP-2	-1.00529	0.649967	-0.546147	1.31675	0.734777	-1.28604	-0.464262	-0.695296	-0.920481	1.09156	-0.142569	1.91334	-0.294642	-0.970198	-0.613411	1.23194
CXCL9/MIG	-0.899122	0.875982	-0.293051	1.66971	0.127903	-1.02084	-0.660751	-0.0521437	-0.817974	1.26651	0.0898647	2.21238	-0.229654	-0.998021	-0.533958	-0.736827
CXCL10/IP-10	-0.765506	0.886994	-0.41329	1.86949	0.227583	-1.19452	-0.257044	-0.400049	-0.821119	1.06972	-0.0451855	2.19787	-0.288823	-0.9244	-0.482145	-0.659576
CXCL11/I-TAC	-0.837682	0.914363	-0.458924	1.83221	0.103403	-1.0747	-0.472866	-0.700586	-0.726146	1.18623	0.254442	2.15055	-0.365978	-0.923658	-0.352036	-0.528634
CXCL13/BLC/BCA-1	-0.864048	0.88109	-0.275064	1.97726	0.218483	-1.14763	-0.479572	-0.782245	-0.757704	1.07469	-0.0569215	2.05906	-0.225982	-1.03584	-0.198714	-0.386862
CXCL16	-0.842519	0.983881	-0.381678	1.62567	0.248797	-1.13372	-0.384505	-0.893409	-0.938645	1.26661	0.101781	2.13457	-0.339269	-0.924509	-0.0593721	-0.463668
Cystatin C	-0.922766	0.756723	-0.549546	1.17208	-0.222477	-1.10938	-0.47731	-0.980956	-0.872602	2.21348	-0.0398804	1.64764	-0.316785	-0.47129	0.684487	-0.511422
DKK-1	-0.901054	0.851096	-0.266805	1.56644	0.413783	-1.25438	-0.368169	-0.895262	-1.00531	1.18125	0.0314953	2.20358	-0.20309	-0.924223	-0.156752	-0.272597
DPPIV/CD26	-0.964224	0.918455	-0.338587	1.36246	0.191908	-1.18046	-0.283807	-0.938276	-1.01612	1.30191	-0.0300926	2.27929	-0.29534	-0.900796	-0.188664	0.0823492
EGF	-0.953352	0.575395	-0.319706	1.43051	0.0247998	-1.27633	-0.387377	-0.7042	-1.04563	1.19058	0.101699	2.2241	-0.2182	-0.993339	-0.44582	0.796863
Endoglin/CD105	-0.870494	0.897038	-0.52698	1.19371	0.147555	-1.2671	-0.473892	-0.889231	-0.929828	1.17497	0.11008	2.11183	-0.236556	-0.951688	-0.545717	1.0563
Endostatin	-0.965593	0.612252	-0.595877	1.4856	-0.0544022	-1.17811	-0.432852	-0.750168	-0.802568	1.3284	-0.106803	2.07074	-0.27565	-0.985971	-0.389185	1.04019
Fetuin A/AHSG	-0.890174	1.05491	-0.611678	1.6141	-0.19503	-1.08753	-0.659921	-0.725708	-0.870438	1.78515	-0.0853855	1.45841	-0.460369	-0.852895	-0.359496	0.886063
FGF acidic	-0.796963	0.993844	-0.346564	1.71934	0.136198	-1.0289	-0.629749	0.0229245	-0.699871	1.037	-0.0364095	2.26683	-0.160471	-0.96148	-0.651325	-0.864388
FGF-21	-0.902775	1.10326	-0.438964	1.76585	0.0522644	-1.10841	-0.363566	-0.541779	-0.644595	1.11697	-0.0117095	2.19996	-0.267605	-0.911914	-0.372705	-0.674297
Flt-3 Ligand	-1.04429	0.694645	-0.237745	2.12469	0.368595	-1.02999	-0.249186	-0.629578	-0.786883	0.794749	-0.0546993	2.11039	-0.237745	-1.04143	-0.237745	-0.543775
Gas 6	-0.90729	0.909196	-0.371236	1.86698	-0.0181013	-1.10037	-0.348372	-0.754858	-0.81075	1.17849	-0.0155608	2.13374	-0.221345	-1.01145	-0.183236	-0.345831
G-CSF	-0.925968	1.27101	-0.375444	1.44769	0.0675352	-1.11289	-0.526518	-0.849151	-0.900362	1.48865	-0.119387	2.04686	-0.31143	-0.8005	-0.216689	-0.183401
GDF-15	-0.940648	0.922555	-0.372213	1.71994	0.204117	-1.14592	-0.353791	-0.966964	-0.853803	1.24098	-0.0590475	2.14101	-0.206419	-0.861698	-0.209051	-0.259052
GM-CSF	-0.760886	0.738564	-0.391412	1.70536	0.285958	-1.2412	-0.493017	-0.905597	-1.02568	0.95717	-0.0496481	2.26573	-0.0250165	-0.917913	-0.363701	0.2213
HGF	-0.967802	0.834438	-0.633558	1.52432	0.104451	-1.17904	-0.379533	-0.938388	-0.986519	1.34784	-0.0773773	2.08852	-0.197705	-0.804691	-0.277923	0.542978
ICAM-1/CD54	-0.954597	0.520573	-0.584347	1.48264	0.205715	-1.20823	-0.389018	-0.945851	-1.02457	1.08615	0.109508	2.13277	-0.28115	-0.855475	-0.310303	1.01618
IFN-gamma	-0.882272	0.636965	-0.48978	1.48603	-0.0518984	-1.16262	-0.30822	-0.919652	-0.930332	1.23238	-0.102629	1.93993	-0.38298	-0.986403	-0.36696	1.28845
IGFBP-1	-1.08394	0.481892	-0.446008	1.56638	0.0498384	-1.22023	-0.437309	-0.791071	-0.735977	1.02123	-0.0922463	2.08542	-0.254629	-0.941855	-0.443109	1.24161
IGFBP-2	-0.995795	0.77995	-0.655342	1.36533	0.020666	-1.18929	-0.469195	-0.826793	-0.924765	1.478	-0.116495	1.81356	-0.398165	-0.858634	-0.243859	1.22082
IGFBP-3)	-0.926368	0.823721	-0.4667	1.63532	0.143796	-1.13226	-0.538523	0.308989	-0.859333	1.06074	0.194072	2.27694	-0.239261	-0.725263	-0.73484	-0.821027
IGFBP-5	-0.903185	0.800001	-0.365062	1.8031	0.285388	-1.08343	-0.503511	-0.273633	-0.832654	0.91494	-0.0202449	2.34645	-0.0568164	-0.87445	-0.56098	-0.675919
IGFBP-6	-0.823076	0.601095	-0.391584	2.21981	0.264382	-1.13485	-0.266876	-0.548717	-0.927831	0.815593	-0.0523775	2.0103	0.234452	-0.980208	-0.361654	-0.65846
IL-1 alpha/IL-1F1	-0.90072	0.992713	-0.318483	1.79853	0.0611348	-1.08238	-0.341773	-0.642207	-0.903049	1.3537	-0.0622993	2.04307	-0.332457	-1.00319	-0.339444	-0.323141
IL-1 beta/ IL-1F2	-0.576542	0.128016	-0.343834	0.344638	-0.175469	-0.679491	-0.396381	-0.482172	-0.5937	0.203083	-0.226944	0.596649	-0.322386	-0.567963	-0.393163	3.48566
IL-1ra/IL-1F3	-0.962628	1.04055	-0.544118	1.52228	0.0269743	-1.04328	-0.402435	-0.899416	-1.01712	1.65088	-0.147405	1.91245	-0.125608	-0.879798	-0.265111	0.133782
IL-2	-0.828626	0.581028	-0.5084	1.61764	0.40606	-1.18847	-0.392854	-0.94087	-0.894652	0.528208	0.0792311	2.35713	-0.0693273	-0.957376	-0.564522	0.775805
IL-3	-0.916295	0.979565	-0.595826	1.47674	0.188875	-1.18884	-0.413128	-0.769538	-1.07503	0.862759	-0.0177831	2.09372	-0.19449	-0.92528	-0.511965	1.00652
IL-4	-1.02478	0.51668	-0.552314	1.48273	0.15507	-1.14356	-0.31212	-1.04326	-0.993109	1.11057	-0.0613682	2.02383	-0.320038	-0.853216	-0.198622	1.21351
IL-5	-0.918996	0.493979	-0.64381	1.48359	0.0653237	-1.21535	-0.326288	-0.659686	-1.05924	1.11315	-0.00876495	2.07365	-0.320995	-1.01955	-0.244261	1.18724
IL-6	-0.984636	0.591072	-0.557276	1.51556	0.143362	-1.21721	-0.350864	-0.810203	-0.897419	1.04169	-0.0397924	1.99525	-0.249112	-0.975914	-0.493317	1.2888
IL-7	-0.987186	0.746789	-0.69819	1.50358	-0.0848536	-1.05788	-0.28029	-0.970553	-1.01629	1.76971	-0.222075	1.50358	-0.436223	-0.825016	-0.0515878	1.10647
IL-10	-0.835313	0.720402	-0.279027	1.80705	0.310259	-0.993242	-0.849456	-0.0244554	-0.776385	1.06926	-0.0220982	2.24783	-0.0409554	-0.809385	-0.670313	-0.85417
IL-11	-0.858442	0.87252	-0.388365	1.8445	0.257992	-1.02248	-0.616059	-0.170464	-0.792338	0.985143	-0.123946	2.28765	-0.190051	-0.909857	-0.474056	-0.70175
IL-12p40	-0.803339	0.907891	-0.30423	1.87046	0.367647	-1.05564	-0.389243	-0.364562	-0.926745	1.0121	-0.224702	2.21325	-0.282291	-0.962396	-0.468772	-0.589435
IL-13	-1.03437	0.697233	-0.453118	1.49008	-0.0226483	-1.19246	-0.419069	-0.645248	-1.0514	1.47062	-0.217211	2.13943	-0.389885	0.655888	-0.49203	-0.535807
IL-15	-0.996634	0.851992	-0.497533	1.66059	0.182806	-1.1946	-0.196399	-0.862797	-0.999422	1.13082	-0.109963	2.24055	-0.316295	-0.784725	-0.073715	-0.0346792
IL-17A	-0.882236	0.78483	-0.262675	1.67904	0.328144	-1.0515	-0.518164	-0.901397	-1.00359	0.612375	0.0119761	2.41677	-0.115768	-0.949301	-0.444711	0.296208
IL-22	-1.02885	0.642152	-0.354533	1.49983	0.296122	-1.13828	-0.0676534	-0.963783	-0.966741	0.784114	-0.123846	2.39005	-0.191869	-0.922378	-0.502409	0.648067
IL-23)	-0.992756	0.706888	-0.505597	1.45116	0.189958	-1.13078	-0.224127	-0.987343	-1.04418	0.836797	-0.0806857	2.24956	-0.253898	-0.892617	-0.318852	0.996477
IL-27p28	-1.01823	0.459364	-0.499419	1.47664	0.00667588	-1.14285	0.021935	-1.0284	-1.06909	0.947657	-0.123027	2.19636	-0.377346	-0.827491	-0.1332	1.11042
IL-28	-1.14037	0.227303	-0.516393	1.52968	-0.235239	-1.02972	-0.242495	-1.17302	-1.2093	0.938349	1.03811	2.05389	-0.574437	-0.311423	-0.00668873	0.651754
IL-33	-1.03228	0.0689517	-0.504567	1.6302	0.0211585	-1.17367	-0.0286262	-0.974534	-1.25532	0.965075	0.204366	1.95878	-0.496602	-0.733576	0.12471	1.22595
LDL R	-0.930032	0.878938	-0.619803	1.58743	-0.162844	-1.07886	-0.326343	-1.03694	-1.0558	1.64193	-0.211055	1.61468	-0.313766	-0.856667	-0.0203064	0.889419
Leptin	-0.749882	0.845487	-0.372155	1.84729	0.308223	-1.00326	-1.09711	0.0689176	-0.707652	1.1411	-0.151619	2.1124	-0.114081	-0.89065	-0.583307	-0.653691
LIF	-0.745622	1.23754	-0.433931	1.89556	-0.0365691	-1.01539	-0.729218	-0.362843	-0.754736	1.4107	-0.0493284	1.81171	-0.412058	-0.887798	-0.145935	-0.782078
Lipocalin-2/NGAL	-0.613729	-0.565597	-0.524073	-0.302293	-0.538229	-0.726506	-0.658084	-0.714237	0.134189	2.30386	0.687694	2.38455	-0.509917	0.175241	0.0936076	-0.626469
LIX	-0.751383	1.06516	-0.382317	1.94987	0.120241	-1.06286	-0.479164	-0.699034	-0.93199	0.936898	-0.0263385	2.11215	-0.167683	-1.01052	-0.280235	-0.392787
M-CSF	-0.880858	0.885335	-0.387646	1.70093	0.174449	-1.09853	-0.277431	-0.71278	-0.831261	0.945953	-0.19477	2.40906	-0.362848	-0.966274	-0.183749	-0.219569
MMP-2	-0.967846	0.858174	-0.513184	1.53402	0.000460806	-1.10302	-0.29937	-0.926066	-1.01454	1.21453	-0.159285	2.29589	-0.34115	-0.778608	0.138088	0.0619016
MMP-3	-0.904465	0.601491	-0.307429	1.56388	0.375746	-1.07971	-0.289607	-1.01437	-0.895554	0.901494	-0.155942	2.35993	-0.218319	-1.00546	-0.509411	0.577729
MMP-9	-0.784185	-0.0962232	-0.703521	-0.110594	-0.488417	-0.809683	-0.687296	-0.807365	-0.457821	2.97735	-0.240399	1.17725	-0.0150955	0.630217	0.859228	-0.443449
Myeloperoxidase	-0.71761	-0.738292	-0.443873	-0.794864	-0.614198	-0.811897	-0.595949	-0.807639	-0.557017	2.32574	0.267236	1.42119	-0.137287	0.3159	1.76732	0.121243
Osteopontin (OPN)	-0.933302	0.69246	-0.376372	1.85372	-0.0753929	-1.09683	-0.454579	-0.935672	-0.940412	0.780147	0.066802	2.0599	-0.326604	-0.971221	-0.293425	0.950781
Osteoprotegerin/ TNFRSF11B	-0.97215	0.696574	-0.430717	1.59063	0.0635143	-1.15818	-0.389068	-0.919395	-0.85831	0.874276	-0.130846	2.09319	-0.189155	-1.00825	-0.433494	1.17137
PD-ECGF/ Thymidine phosphorylase	-1.04387	0.770336	-0.532429	1.44971	0.579502	-1.24488	-0.555329	-1.25251	-1.08967	1.08076	-0.458639	1.85173	-0.346683	0.309788	-0.40775	0.889926
PDGF-BB	-0.588125	0.123056	-0.490715	0.67476	-0.263137	-0.709673	-0.690708	-0.057972	-0.536403	0.304084	-0.333824	0.596315	-0.376926	3.37208	-0.567436	-0.455372
Pentraxin 2/SAP	-0.807523	0.734586	-0.425835	1.62519	0.0896639	-1.07076	-0.827266	-0.224023	-0.80533	0.668777	-0.267895	1.86868	1.64055	-0.99398	-0.476288	-0.728553
Pentraxin 3/ TSG-14	-0.617161	0.508257	-0.555806	1.31112	-0.210468	-0.980029	-0.594372	-0.809989	-0.801225	0.538057	-0.326165	1.48642	-0.438356	2.51367	-0.377002	-0.646962
Periostin/OSF-2	-0.904548	0.958738	-0.310249	2.04398	0.39602	-1.0481	-0.554285	-0.68348	-0.993549	0.780736	-0.14373	2.06408	-0.0202765	-0.927516	-0.28441	-0.373411
Pref-1/DLK-1/FA1	-0.943965	0.786721	-0.415144	1.86306	0.252559	-1.02943	-0.351045	-0.855828	-1.02409	1.07517	-0.353716	2.18089	-0.249554	-0.781046	0.143055	-0.297629
Proliferin	-0.958148	0.957007	-0.430853	1.62811	0.146661	-1.07228	-0.455962	-0.926191	-0.987823	1.19212	0.158074	2.16454	-0.28248	-0.926191	-0.218565	0.011984
Proprotein Convertase 9/ PCSK9	-0.987498	0.781783	-0.543206	1.49423	0.0798542	-1.15838	-0.104172	-1.12683	-0.979611	1.06045	-0.417016	2.14621	-0.293456	-0.908629	0.369038	0.587241
RAGE	-0.868	-0.0453391	-0.711912	0.402454	-0.253883	-0.917897	-0.512324	-0.994661	-0.392059	0.218219	-0.491853	0.744057	1.09973	3.02269	-0.270515	-0.0287068
RBP4	-1.09424	0.29655	-0.773589	0.863095	-0.311304	-1.23784	-0.502119	-0.848341	-0.92506	0.465727	-0.177537	1.38833	0.219831	2.51158	-0.370319	0.495234
Reg3G	-1.03306	0.646786	-0.58039	1.64109	0.10777	-0.842048	-0.255934	-1.03306	-0.967644	0.806397	-0.38938	2.1173	-0.344898	-0.87868	-0.208836	1.21458
Resistin	-1.07161	0.58237	-0.576881	1.5894	0.485766	-1.07161	-0.404164	-1.05405	-0.676413	0.772651	-0.260722	2.12218	-0.231448	-1.01306	-0.289996	1.09759
E-Selectin/CD62E	-0.220836	0.901499	-0.212913	2.13475	0.307322	-1.20321	-0.912722	0.000990295	-0.883673	0.951674	-0.358157	1.81785	-0.175942	-1.18208	-0.754275	-0.210273
P-Selectin/CD62P	-0.831554	0.830148	-0.190491	2.0476	0.360598	-1.11834	-0.536328	-0.719087	-0.966514	0.610837	-0.182056	2.21068	0.0035146	-0.848424	-0.207361	-0.463224
Serpin E1/PAI-1	-0.991837	0.884114	-0.240405	1.94295	0.390166	-1.08905	-0.471615	-0.810547	-0.834194	0.881487	-0.434832	2.15577	-0.143192	-0.865722	-0.0538613	-0.319227
Serpin F1/PEDF	-1.02072	0.710812	-0.323607	1.97292	0.230144	-1.02915	-0.320796	-0.770544	-1.04039	0.85698	-0.20836	2.16968	-0.0706244	-1.03196	-0.0340824	-0.0903009
Thrombopoietin	-0.914828	0.787625	-0.386765	1.75299	0.397079	-1.22011	-0.334509	-0.942331	-1.06885	0.974647	-0.386765	2.12153	-0.141986	-0.876323	-0.119983	0.358574
TIM-1/KIM-1/ HAVCR	-0.873964	0.71912	-0.310386	1.55054	0.306201	-1.23387	-0.184837	-1.11948	-0.988353	0.984168	-0.394086	2.13085	-0.112297	-1.06647	-0.120667	0.713539
TNF-alpha	-1.06837	0.831514	-0.466826	1.49071	0.144747	-1.03579	-0.228713	-1.1185	-0.955583	1.18492	-0.454293	1.96443	-0.161039	-1.02326	-0.0382233	0.934278
VCAM-1/CD106	-1.08874	0.930386	-0.560518	1.48833	0.0706007	-1.07502	-0.320419	-1.06358	-0.958398	1.35342	-0.174072	1.83362	-0.212946	-0.924098	-0.256392	0.957826
VEGF	-1.09051	0.648417	-0.475869	1.64977	0.0977988	-1.13149	-0.191596	-1.09051	-0.939413	0.922446	-0.386233	1.99551	-0.027691	-0.947096	-0.107082	1.07355
WISP-1/CCN4	-0.981609	0.528658	-0.375942	1.56583	-0.851637	-0.960813	-0.144593	-0.958214	-0.799649	1.01735	-0.199181	2.1689	0.0607616	-1.0258	-0.0900052	1.04594
